# Supplementary material for: The novel angiogenesis regulator circFAM169A promotes the metastasis of colorectal cancer through the angiopoietin-2 signaling axis
Source: Aging (Albany NY). 2023 Aug 23;15(16):8367–83. doi: 10.18632/aging.204974 (PMC10496999; doi:10.18632/aging.204974)
Supplement: Supplementary Table 1 [file aging-15-204974-s002.xlsx]

## Sheet: Sheet1
Supplementary Table 1. RT-qPCR primer sequences and Western blot antibody information.
RT-qPCR primer sequences		Western blot antibody
Gene	Sequence	Antibody		Cat	source
CircFAM169A (Divergent)	Forward: 5ʹ-TCATGTATACAGAGGATGGCATT-3’	ANGPT2	CST	#2948S	Rabbit
	Reverse: 5ʹ-TTCAGGGTCCCCACACCTTA-3’	TIE2	CST	#7403	Rabbit
CircFAM169A (Convergent)	Forward: 5ʹ-GCTTGCGGTATCCACTGTCT-3’	P-TIE2	CST	#4226	Rabbit
	Reverse: 5ʹ-ATTTTCAGGGTCCCCACACC-3’	FAK	Abcam	Ab40794	Rabbit
U6	Forward: 5′-CTCGCTTCGGCAGCACA-3′	P-FAK	Abcam	Ab81298	Rabbit
	Reverse: 5ʹ-AACGCTTCACGAATTTGCGT-3’	ACTIN	proteintech	81115-1-RR	Rabbit
ANGPT2	Forward: 5′-AACTTTCGGAAGAGCATGGAC-3′	AKT	proteintech	60203-2-Ig	Mouse
	Reverse: 5′-CGAGTCATCGTATTCGAGCGG-3′	P-AKT	proteintech	80455-1-RR	Rabbit
GAPDH	Forward: 5′-GAGTCCACTGGCGTCTTCAC-3′
	Reverse: 5′-TGCTGATGATCTTGAGGCTGTT-3′
miR-1253	Forward: 5′- CGCGCGAGAGAAGAAGATCAG-3′
	Reverse: Kit universal reverse primer
miR-450b-3p	Forward: 5′-CGCGTTTTGCAATATGTTCC-3′
	Reverse: Kit universal reverse primer
miR-647	Forward: 5′-GCGGTGGCTGCACTCACT-3′
	Reverse: Kit universal reverse primer
miR-583	Forward: 5′-CGCGCAAAGAGGAAGGTCC-3′
	Reverse: Kit universal reverse primer
miR-518a-5p	Forward: 5′- GCGCTGCAAAGGGAAGC-3′
	Reverse: Kit universal reverse primer
