# Supplementary material for: The novel angiogenesis regulator circFAM169A promotes the metastasis of colorectal cancer through the angiopoietin-2 signaling axis
Source: Aging (Albany NY). 2023 Aug 23;15(16):8367–83. doi: 10.18632/aging.204974 (PMC10496999; doi:10.18632/aging.204974)
Supplement: Supplementary Table 2 [file aging-15-204974-s003.xlsx]

## Sheet: KEGG
Supplementary Table 2. The identified gene clusters.
UP
ID	Description	GeneRatio	BgRatio	pvalue	p.adjust	qvalue	geneID	Count
hsa04512	ECM-receptor interaction	5/73	88/8163	0.00109646	0.108336	0.102401	FRAS1/COMP/COL9A3/CD36/FREM2	5
hsa04350	TGF-beta signaling pathway	5/73	94/8163	0.00147396	0.108336	0.102401	NOG/INHBB/BMP7/TGFB3/BAMBI	5
hsa03320	PPAR signaling pathway	4/73	75/8163	0.0044338	0.169955	0.160645	FABP4/PLIN4/ADIPOQ/CD36	4
hsa04060	Cytokine-cytokine receptor interaction	8/73	295/8163	0.00462463	0.169955	0.160645	TNFRSF19/LEP/INHBB/BMP7/CCL7/TGFB3/IL31RA/CCL8	8
hsa04975	Fat digestion and absorption	3/73	43/8163	0.00655392	0.192685	0.18213	PLA2G5/APOA4/CD36	3
hsa05144	Malaria	3/73	50/8163	0.00995593	0.209537	0.198059	COMP/TGFB3/CD36	3
hsa04979	Cholesterol metabolism	3/73	51/8163	0.0105112	0.209537	0.198059	LIPC/APOA4/CD36	3
hsa04145	Phagosome	5/73	152/8163	0.0114034	0.209537	0.198059	MARCO/COMP/DYNC1I1/TUBB2B/CD36	5
hsa00140	Steroid hormone biosynthesis	3/73	61/8163	0.0170507	0.250646	0.236916	CYP2E1/CYP11B2/AKR1C4	3
hsa00590	Arachidonic acid metabolism	3/73	61/8163	0.0170507	0.250646	0.236916	CYP2E1/GPX3/PLA2G5	3
hsa04920	Adipocytokine signaling pathway	3/73	69/8163	0.0236001	0.289101	0.273264	LEP/ADIPOQ/CD36	3
hsa04924	Renin secretion	3/73	69/8163	0.0236001	0.289101	0.273264	AGTR1/KCNMA1/PRKG2	3
hsa00591	Linoleic acid metabolism	2/73	29/8163	0.0274096	0.309939	0.292961	CYP2E1/PLA2G5	2
hsa04610	Complement and coagulation cascades	3/73	85/8163	0.0402355	0.400505	0.378565	F5/SERPINA5/F10	3
hsa00350	Tyrosine metabolism	2/73	36/8163	0.0408678	0.400505	0.378565	TH/MAOB	2
DOWN
ID	Description	GeneRatio	BgRatio	pvalue	p.adjust	qvalue	geneID	Count
hsa04918	Thyroid hormone synthesis	2023-03-16	75/8163	0.000382831	0.0321578	0.0314324	PLCB4/DUOX2/DUOXA2	3
hsa00512	Mucin type O-glycan biosynthesis	2023-02-16	36/8163	0.00218285	0.0916795	0.0896116	ST6GALNAC1/B3GNT6	2
hsa04350	TGF-beta signaling pathway	2023-02-16	94/8163	0.0141754	0.325406	0.318066	LEFTY1/BMP5	2
hsa04933	AGE-RAGE signaling pathway in diabetic complications	2023-02-16	100/8163	0.0159439	0.325406	0.318066	NOX1/PLCB4	2
hsa04935	Growth hormone synthesis, secretion and action	2023-02-16	120/8163	0.0224806	0.325406	0.318066	PLCB4/MRAP2	2
hsa00533	Glycosaminoglycan biosynthesis - keratan sulfate	2023-01-16	14/8163	0.0271153	0.325406	0.318066	CHST4	1

## Sheet: GOUP
UP
ONTOLOGY	ID	Description	GeneRatio	BgRatio	pvalue	p.adjust	qvalue	geneID	Count
BP	GO:0048608	reproductive structure development	16/152	405/18862	1.817e-07	0.000255293	0.000194849	PTPRN/NOG/LEP/TEX19/INHBB/SIX4/TESC/SERPINA5/PCYT1B/TPPP3/PTX3/BMP7/COL9A3/VGF/NDP/LHX3	16
BP	GO:0061458	reproductive system development	16/152	408/18862	2.00749e-07	0.000255293	0.000194849	PTPRN/NOG/LEP/TEX19/INHBB/SIX4/TESC/SERPINA5/PCYT1B/TPPP3/PTX3/BMP7/COL9A3/VGF/NDP/LHX3	16
BP	GO:0015850	organic hydroxy compound transport	13/152	271/18862	3.092e-07	0.000255293	0.000194849	SLC16A8/KCNB1/AGTR1/LEP/SYT1/LIPC/SLCO1A2/CES1/MAOB/AKR1C4/APOA4/ADIPOQ/CD36	13
BP	GO:0015849	organic acid transport	14/152	324/18862	3.79901e-07	0.000255293	0.000194849	SLC16A8/FABP4/LEP/SYT1/SLC11A1/SLCO1A2/SLC7A10/SNAP25/PLA2G5/SLC38A11/THRSP/RGS4/AKR1C4/CD36	14
BP	GO:2000121	regulation of removal of superoxide radicals	4/152	10/18862	8.19788e-07	0.000342284	0.000261243	MIR675/H19/BMP7/CD36	4
BP	GO:0001503	ossification	15/152	401/18862	8.93455e-07	0.000342284	0.000261243	NOG/LEP/HAND2/OMD/DLX5/PTH1R/FGF18/COMP/MIR675/CTHRC1/SOX2/BMP7/TGFB3/MSX2/BAMBI	15
BP	GO:0019430	removal of superoxide radicals	5/152	23/18862	9.52219e-07	0.000342284	0.000261243	MIR675/H19/BMP7/APOA4/CD36	5
BP	GO:0006869	lipid transport	16/152	461/18862	1.0187e-06	0.000342284	0.000261243	AGTR1/FABP4/LEP/SYT1/LIPC/SERPINA5/SLCO1A2/CES1/SNAP25/PLA2G5/THRSP/LBP/AKR1C4/APOA4/ADIPOQ/CD36	16
BP	GO:0048705	skeletal system morphogenesis	11/152	213/18862	1.26705e-06	0.000362656	0.000276792	NOG/HOXC4/DLX5/SIX4/HOXC9/FGF18/TRPV4/COMP/BMP7/TGFB3/MSX2	11
BP	GO:0071450	cellular response to oxygen radical	5/152	25/18862	1.48408e-06	0.000362656	0.000276792	MIR675/H19/BMP7/APOA4/CD36	5
BP	GO:0071451	cellular response to superoxide	5/152	25/18862	1.48408e-06	0.000362656	0.000276792	MIR675/H19/BMP7/APOA4/CD36	5
BP	GO:0000303	response to superoxide	5/152	28/18862	2.69227e-06	0.000603068	0.000460283	MIR675/H19/BMP7/APOA4/CD36	5
BP	GO:0000305	response to oxygen radical	5/152	29/18862	3.23209e-06	0.000646313	0.000493289	MIR675/H19/BMP7/APOA4/CD36	5
BP	GO:0046942	carboxylic acid transport	12/152	284/18862	3.36621e-06	0.000646313	0.000493289	SLC16A8/LEP/SYT1/SLC11A1/SLCO1A2/CES1/SLC7A10/SNAP25/PLA2G5/RGS4/AKR1C4/CD36	12
BP	GO:0048736	appendage development	9/152	167/18862	8.56373e-06	0.00137808	0.0010518	NOG/CRABP2/HAND2/DLX5/MEOX2/FRAS1/COMP/BMP7/FREM2	9
BP	GO:0060173	limb development	9/152	167/18862	8.56373e-06	0.00137808	0.0010518	NOG/CRABP2/HAND2/DLX5/MEOX2/FRAS1/COMP/BMP7/FREM2	9
BP	GO:0008406	gonad development	10/152	212/18862	8.71552e-06	0.00137808	0.0010518	PTPRN/LEP/TEX19/INHBB/SIX4/TESC/PCYT1B/PTX3/COL9A3/VGF	10
BP	GO:0001501	skeletal system development	15/152	486/18862	9.3215e-06	0.00139201	0.00106243	NOG/HOXC4/LEP/HAND2/DLX5/HOXC6/SIX4/PTH1R/HOXC9/FGF18/TRPV4/COMP/BMP7/TGFB3/MSX2	15
BP	GO:0008585	female gonad development	7/152	93/18862	1.01962e-05	0.00143631	0.00109625	PTPRN/LEP/INHBB/PCYT1B/PTX3/COL9A3/VGF	7
BP	GO:0045137	development of primary sexual characteristics	10/152	217/18862	1.06869e-05	0.00143631	0.00109625	PTPRN/LEP/TEX19/INHBB/SIX4/TESC/PCYT1B/PTX3/COL9A3/VGF	10
BP	GO:1901031	regulation of response to reactive oxygen species	5/152	37/18862	1.12632e-05	0.00144169	0.00110035	MIR675/H19/BMP7/GPR37/CD36	5
BP	GO:0046545	development of primary female sexual characteristics	7/152	97/18862	1.34598e-05	0.00158363	0.00120869	PTPRN/LEP/INHBB/PCYT1B/PTX3/COL9A3/VGF	7
BP	GO:0001649	osteoblast differentiation	10/152	223/18862	1.35504e-05	0.00158363	0.00120869	NOG/HAND2/DLX5/PTH1R/MIR675/CTHRC1/SOX2/BMP7/MSX2/BAMBI	10
BP	GO:0015718	monocarboxylic acid transport	9/152	178/18862	1.43023e-05	0.00160186	0.0012226	SLC16A8/LEP/SYT1/SLCO1A2/CES1/SNAP25/PLA2G5/AKR1C4/CD36	9
BP	GO:2000379	positive regulation of reactive oxygen species metabolic process	7/152	101/18862	1.75439e-05	0.00184462	0.00140788	MMP8/AGTR1/LEP/MIR675/H19/PTX3/CD36	7
BP	GO:0072593	reactive oxygen species metabolic process	11/152	281/18862	1.78423e-05	0.00184462	0.00140788	MMP8/AGTR1/LEP/GPX3/MIR675/H19/PTX3/BMP7/MAOB/APOA4/CD36	11
BP	GO:0051216	cartilage development	9/152	185/18862	1.94484e-05	0.0019362	0.00147778	NOG/HOXC4/LEP/HAND2/PTH1R/FGF18/TRPV4/COMP/BMP7	9
BP	GO:0046660	female sex differentiation	7/152	111/18862	3.23963e-05	0.00307554	0.00234736	PTPRN/LEP/INHBB/PCYT1B/PTX3/COL9A3/VGF	7
BP	GO:0030326	embryonic limb morphogenesis	7/152	112/18862	3.43252e-05	0.00307554	0.00234736	NOG/CRABP2/HAND2/DLX5/FRAS1/BMP7/FREM2	7
BP	GO:0035113	embryonic appendage morphogenesis	7/152	112/18862	3.43252e-05	0.00307554	0.00234736	NOG/CRABP2/HAND2/DLX5/FRAS1/BMP7/FREM2	7
BP	GO:0010975	regulation of neuron projection development	13/152	428/18862	4.44381e-05	0.00381708	0.00291334	OBSL1/CRABP2/TENM3/PLXNB3/MARK1/SEMA3E/TRPV4/SNAP25/BMP7/ZNF365/CTNNA2/SPOCK1/CHRNA3	13
BP	GO:0048706	embryonic skeletal system development	7/152	117/18862	4.54415e-05	0.00381708	0.00291334	NOG/HOXC4/HOXC6/SIX4/HOXC9/BMP7/TGFB3	7
BP	GO:0007548	sex differentiation	10/152	262/18862	5.36299e-05	0.00434423	0.00331568	PTPRN/LEP/TEX19/INHBB/SIX4/TESC/PCYT1B/PTX3/COL9A3/VGF	10
BP	GO:0015711	organic anion transport	12/152	376/18862	5.49494e-05	0.00434423	0.00331568	SLC16A8/LEP/SYT1/SLC11A1/SLCO1A2/CES1/SLC7A10/SNAP25/PLA2G5/RGS4/AKR1C4/CD36	12
BP	GO:0045471	response to ethanol	7/152	126/18862	7.28348e-05	0.00559371	0.00426932	CYP2E1/TH/LEP/CCL7/MAOB/RGS4/ADIPOQ	7
BP	GO:0060993	kidney morphogenesis	6/152	88/18862	7.80281e-05	0.00571116	0.00435896	NOG/SIX4/FRAS1/BMP7/TACSTD2/KIF26B	6
BP	GO:1903428	positive regulation of reactive oxygen species biosynthetic process	5/152	55/18862	7.99943e-05	0.00571116	0.00435896	MMP8/MIR675/H19/PTX3/CD36	5
BP	GO:0008228	opsonization	3/152	11/18862	8.07381e-05	0.00571116	0.00435896	PLA2G5/PTX3/LBP	3
BP	GO:0048562	embryonic organ morphogenesis	10/152	277/18862	8.52672e-05	0.00580011	0.00442685	NOG/TH/HOXC4/HAND2/DLX5/SIX4/HOXC9/CTHRC1/BMP7/TGFB3	10
BP	GO:0048704	embryonic skeletal system morphogenesis	6/152	90/18862	8.84689e-05	0.00580011	0.00442685	NOG/HOXC4/SIX4/HOXC9/BMP7/TGFB3	6
BP	GO:0060349	bone morphogenesis	6/152	90/18862	8.84689e-05	0.00580011	0.00442685	DLX5/FGF18/TRPV4/COMP/TGFB3/MSX2	6
BP	GO:0090183	regulation of kidney development	4/152	30/18862	9.43616e-05	0.00603914	0.00460929	NOG/SIX4/TACSTD2/ADIPOQ	4
BP	GO:0035107	appendage morphogenesis	7/152	134/18862	0.000107323	0.00650891	0.00496784	NOG/CRABP2/HAND2/DLX5/FRAS1/BMP7/FREM2	7
BP	GO:0035108	limb morphogenesis	7/152	134/18862	0.000107323	0.00650891	0.00496784	NOG/CRABP2/HAND2/DLX5/FRAS1/BMP7/FREM2	7
BP	GO:0050804	modulation of chemical synaptic transmission	12/152	405/18862	0.000111207	0.00650891	0.00496784	KCNB1/BCHE/SYT1/JPH3/SCGN/SNAP25/VGF/TUBB2B/RGS4/ADIPOQ/NTF4/CHRNA3	12
BP	GO:0015837	amine transport	6/152	94/18862	0.000112679	0.00650891	0.00496784	KCNB1/TH/LEP/SYT1/RGS4/CHRNA3	6
BP	GO:0099177	regulation of trans-synaptic signaling	12/152	406/18862	0.000113809	0.00650891	0.00496784	KCNB1/BCHE/SYT1/JPH3/SCGN/SNAP25/VGF/TUBB2B/RGS4/ADIPOQ/NTF4/CHRNA3	12
BP	GO:0072001	renal system development	10/152	288/18862	0.000117493	0.00657365	0.00501725	NOG/AGTR1/SIX4/FRAS1/EMX2/BMP7/TACSTD2/KIF26B/ADIPOQ/FREM2	10
BP	GO:0010743	regulation of macrophage derived foam cell differentiation	4/152	32/18862	0.000122278	0.00657365	0.00501725	AGTR1/PLA2G5/ADIPOQ/CD36	4
BP	GO:0090322	regulation of superoxide metabolic process	4/152	32/18862	0.000122278	0.00657365	0.00501725	MIR675/H19/BMP7/CD36	4
BP	GO:0034368	protein-lipid complex remodeling	4/152	33/18862	0.000138275	0.00711563	0.00543091	AGTR1/LIPC/PLA2G5/APOA4	4
BP	GO:0034369	plasma lipoprotein particle remodeling	4/152	33/18862	0.000138275	0.00711563	0.00543091	AGTR1/LIPC/PLA2G5/APOA4	4
BP	GO:0009636	response to toxic substance	9/152	239/18862	0.000141224	0.00711563	0.00543091	TH/CES1/GPX3/MIR675/H19/BMP7/MAOB/APOA4/CD36	9
BP	GO:0007162	negative regulation of cell adhesion	10/152	295/18862	0.000142948	0.00711563	0.00543091	PLXNB3/CLEC4G/SEMA3E/TRPV4/MIR675/POSTN/VTCN1/SPOCK1/TACSTD2/ADIPOQ	10
BP	GO:0061448	connective tissue development	9/152	243/18862	0.000159984	0.00776149	0.00592385	NOG/HOXC4/LEP/HAND2/PTH1R/FGF18/TRPV4/COMP/BMP7	9
BP	GO:0090596	sensory organ morphogenesis	9/152	244/18862	0.000164985	0.00776149	0.00592385	NOG/IGFN1/OBSL1/TH/TENM3/DLX5/SIX4/CTHRC1/BMP7	9
BP	GO:2000377	regulation of reactive oxygen species metabolic process	8/152	192/18862	0.000167471	0.00776149	0.00592385	MMP8/AGTR1/LEP/MIR675/H19/PTX3/BMP7/CD36	8
BP	GO:0097006	regulation of plasma lipoprotein particle levels	6/152	101/18862	0.000167473	0.00776149	0.00592385	AGTR1/LIPC/PLA2G5/APOA4/ADIPOQ/CD36	6
BP	GO:0034367	protein-containing complex remodeling	4/152	35/18862	0.000174733	0.0079193	0.0060443	AGTR1/LIPC/PLA2G5/APOA4	4
BP	GO:0098869	cellular oxidant detoxification	6/152	102/18862	0.00017677	0.0079193	0.0060443	GPX3/MIR675/H19/BMP7/APOA4/CD36	6
BP	GO:1901617	organic hydroxy compound biosynthetic process	9/152	251/18862	0.000203783	0.0089798	0.00685371	TH/LEP/HAND2/PTH1R/CES1/CYP11B2/AKR1C4/GPR37/APOA4	9
BP	GO:0006865	amino acid transport	7/152	152/18862	0.000234374	0.00999745	0.00763042	LEP/SYT1/SLC11A1/SLC7A10/SNAP25/SLC38A11/RGS4	7
BP	GO:0043583	ear development	8/152	202/18862	0.000236727	0.00999745	0.00763042	NOG/DLX5/SIX4/CTHRC1/SOX2/TGFB3/LHX3/FREM2	8
BP	GO:0010742	macrophage derived foam cell differentiation	4/152	38/18862	0.000241754	0.00999745	0.00763042	AGTR1/PLA2G5/ADIPOQ/CD36	4
BP	GO:0090077	foam cell differentiation	4/152	38/18862	0.000241754	0.00999745	0.00763042	AGTR1/PLA2G5/ADIPOQ/CD36	4
BP	GO:0006801	superoxide metabolic process	5/152	70/18862	0.0002526	0.0101844	0.0077731	MIR675/H19/BMP7/APOA4/CD36	5
BP	GO:0030301	cholesterol transport	6/152	109/18862	0.000253852	0.0101844	0.0077731	LEP/LIPC/CES1/APOA4/ADIPOQ/CD36	6
BP	GO:0072028	nephron morphogenesis	5/152	71/18862	0.000269989	0.0106725	0.00814564	NOG/SIX4/BMP7/TACSTD2/KIF26B	5
BP	GO:0001655	urogenital system development	10/152	320/18862	0.000275161	0.0107193	0.00818136	NOG/AGTR1/SIX4/FRAS1/EMX2/BMP7/TACSTD2/KIF26B/ADIPOQ/FREM2	10
BP	GO:0030282	bone mineralization	6/152	113/18862	0.000308489	0.0118245	0.00902487	LEP/OMD/PTH1R/COMP/BMP7/TGFB3	6
BP	GO:0030299	intestinal cholesterol absorption	3/152	17/18862	0.000321126	0.0118245	0.00902487	LEP/APOA4/CD36	3
BP	GO:0033194	response to hydroperoxide	3/152	17/18862	0.000321126	0.0118245	0.00902487	GPX3/APOA4/CD36	3
BP	GO:0034374	low-density lipoprotein particle remodeling	3/152	17/18862	0.000321126	0.0118245	0.00902487	AGTR1/LIPC/PLA2G5	3
BP	GO:1990748	cellular detoxification	6/152	115/18862	0.000339057	0.012316	0.00940003	GPX3/MIR675/H19/BMP7/APOA4/CD36	6
BP	GO:0060973	cell migration involved in heart development	3/152	18/18862	0.000383079	0.0135539	0.0103448	HAND2/FLRT3/BMP7	3
BP	GO:1903792	negative regulation of anion transport	8/152	217/18862	0.000383219	0.0135539	0.0103448	KCNB1/LEP/INHBB/PRKG2/MAOB/RGS4/ADIPOQ/CD36	8
BP	GO:0022602	ovulation cycle process	4/152	43/18862	0.000391755	0.0136758	0.0104379	PTPRN/LEP/PTX3/TGFB3	4
BP	GO:0050886	endocrine process	5/152	78/18862	0.000418449	0.0143058	0.0109187	AGTR1/LEP/INHBB/CES1/CYP11B2	5
BP	GO:0007411	axon guidance	9/152	277/18862	0.000420445	0.0143058	0.0109187	NOG/DLX5/PLXNB3/SEMA3E/FLRT3/BMP7/TUBB2B/SLIT1/LHX3	9
BP	GO:0097485	neuron projection guidance	9/152	278/18862	0.000431573	0.0145009	0.0110676	NOG/DLX5/PLXNB3/SEMA3E/FLRT3/BMP7/TUBB2B/SLIT1/LHX3	9
BP	GO:0010744	positive regulation of macrophage derived foam cell differentiation	3/152	19/18862	0.000452226	0.0146564	0.0111863	AGTR1/PLA2G5/CD36	3
BP	GO:0098856	intestinal lipid absorption	3/152	19/18862	0.000452226	0.0146564	0.0111863	LEP/APOA4/CD36	3
BP	GO:0001822	kidney development	9/152	280/18862	0.000454558	0.0146564	0.0111863	NOG/AGTR1/SIX4/FRAS1/BMP7/TACSTD2/KIF26B/ADIPOQ/FREM2	9
BP	GO:0015918	sterol transport	6/152	122/18862	0.000465151	0.0146564	0.0111863	LEP/LIPC/CES1/APOA4/ADIPOQ/CD36	6
BP	GO:0097237	cellular response to toxic substance	6/152	122/18862	0.000465151	0.0146564	0.0111863	GPX3/MIR675/H19/BMP7/APOA4/CD36	6
BP	GO:0000302	response to reactive oxygen species	8/152	224/18862	0.000473216	0.0146564	0.0111863	PTPRN/CYP2E1/MIR675/H19/BMP7/GPR37/APOA4/CD36	8
BP	GO:1903409	reactive oxygen species biosynthetic process	6/152	123/18862	0.000485799	0.0146564	0.0111863	MMP8/MIR675/H19/PTX3/MAOB/CD36	6
BP	GO:0060560	developmental growth involved in morphogenesis	8/152	225/18862	0.000487367	0.0146564	0.0111863	CRABP2/SYT1/SIX4/SEMA3E/FLRT3/POSTN/KIF26B/SLIT1	8
BP	GO:0050873	brown fat cell differentiation	4/152	46/18862	0.000508409	0.0146564	0.0111863	FABP4/LEP/BMP7/ADIPOQ	4
BP	GO:0048568	embryonic organ development	11/152	412/18862	0.000521204	0.0146564	0.0111863	NOG/TH/HOXC4/HAND2/DLX5/SIX4/HOXC9/CTHRC1/BMP7/TGFB3/TUBB2B	11
BP	GO:0001656	metanephros development	5/152	82/18862	0.00052707	0.0146564	0.0111863	SIX4/FRAS1/BMP7/KIF26B/ADIPOQ	5
BP	GO:0009713	catechol-containing compound biosynthetic process	3/152	20/18862	0.000528896	0.0146564	0.0111863	TH/HAND2/GPR37	3
BP	GO:0042423	catecholamine biosynthetic process	3/152	20/18862	0.000528896	0.0146564	0.0111863	TH/HAND2/GPR37	3
BP	GO:0043586	tongue development	3/152	20/18862	0.000528896	0.0146564	0.0111863	HAND2/SIX4/NTF4	3
BP	GO:0043691	reverse cholesterol transport	3/152	20/18862	0.000528896	0.0146564	0.0111863	LIPC/CES1/APOA4	3
BP	GO:0060039	pericardium development	3/152	20/18862	0.000528896	0.0146564	0.0111863	HAND2/FLRT3/BMP7	3
BP	GO:0090189	regulation of branching involved in ureteric bud morphogenesis	3/152	20/18862	0.000528896	0.0146564	0.0111863	NOG/SIX4/TACSTD2	3
BP	GO:0048839	inner ear development	7/152	176/18862	0.000568106	0.0155823	0.011893	DLX5/SIX4/CTHRC1/SOX2/TGFB3/LHX3/FREM2	7
BP	GO:1900407	regulation of cellular response to oxidative stress	5/152	84/18862	0.000588722	0.0159679	0.0121873	MIR675/H19/BMP7/GPR37/CD36	5
BP	GO:0060688	regulation of morphogenesis of a branching structure	4/152	48/18862	0.000598706	0.0159679	0.0121873	NOG/SIX4/BMP7/TACSTD2	4
BP	GO:0045667	regulation of osteoblast differentiation	6/152	128/18862	0.000599984	0.0159679	0.0121873	NOG/HAND2/MIR675/CTHRC1/BMP7/BAMBI	6
BP	GO:0097305	response to alcohol	8/152	233/18862	0.000613396	0.0160082	0.0122181	CYP2E1/TH/LEP/CES1/CCL7/MAOB/RGS4/ADIPOQ	8
BP	GO:0044241	lipid digestion	3/152	21/18862	0.000613411	0.0160082	0.0122181	LEP/APOA4/CD36	3
BP	GO:0001657	ureteric bud development	5/152	86/18862	0.000655633	0.0166259	0.0126895	NOG/SIX4/BMP7/TACSTD2/KIF26B	5
BP	GO:0051952	regulation of amine transport	5/152	86/18862	0.000655633	0.0166259	0.0126895	KCNB1/LEP/SYT1/RGS4/CHRNA3	5
BP	GO:0060021	roof of mouth development	5/152	86/18862	0.000655633	0.0166259	0.0126895	HAND2/DLX5/MEOX2/FRAS1/TGFB3	5
BP	GO:0090066	regulation of anatomical structure size	12/152	493/18862	0.000662396	0.0166404	0.0127005	AGTR1/CRABP2/KCNMA1/LEP/ARHGAP40/NEB/SEMA3E/TRPV4/COMP/MAGEL2/KANK4/CTNNA2	12
BP	GO:0001654	eye development	10/152	359/18862	0.000676456	0.0167166	0.0127587	IGFN1/OBSL1/TH/TENM3/KERA/SALL2/SOX2/BMP7/NDP/FREM2	10
BP	GO:0072073	kidney epithelium development	6/152	131/18862	0.000677867	0.0167166	0.0127587	NOG/SIX4/BMP7/TACSTD2/KIF26B/ADIPOQ	6
BP	GO:0072163	mesonephric epithelium development	5/152	87/18862	0.000691147	0.016737	0.0127743	NOG/SIX4/BMP7/TACSTD2/KIF26B	5
BP	GO:0072164	mesonephric tubule development	5/152	87/18862	0.000691147	0.016737	0.0127743	NOG/SIX4/BMP7/TACSTD2/KIF26B	5
BP	GO:0045668	negative regulation of osteoblast differentiation	4/152	50/18862	0.000699833	0.016796	0.0128193	NOG/HAND2/MIR675/BAMBI	4
BP	GO:1901032	negative regulation of response to reactive oxygen species	3/152	22/18862	0.000706084	0.0167961	0.0128194	MIR675/H19/GPR37	3
BP	GO:0002532	production of molecular mediator involved in inflammatory response	5/152	88/18862	0.000728082	0.0171674	0.0131028	LEP/MIR675/H19/LBP/CD36	5
BP	GO:0150063	visual system development	10/152	363/18862	0.000736427	0.0172132	0.0131377	IGFN1/OBSL1/TH/TENM3/KERA/SALL2/SOX2/BMP7/NDP/FREM2	10
BP	GO:0001890	placenta development	6/152	135/18862	0.000793639	0.0181997	0.0138907	LEP/TEX19/TPPP3/BMP7/NDP/LHX3	6
BP	GO:0006584	catecholamine metabolic process	4/152	52/18862	0.000812487	0.0181997	0.0138907	TH/HAND2/MAOB/GPR37	4
BP	GO:0009712	catechol-containing compound metabolic process	4/152	52/18862	0.000812487	0.0181997	0.0138907	TH/HAND2/MAOB/GPR37	4
BP	GO:0060350	endochondral bone morphogenesis	4/152	52/18862	0.000812487	0.0181997	0.0138907	DLX5/FGF18/TRPV4/COMP	4
BP	GO:0071827	plasma lipoprotein particle organization	4/152	52/18862	0.000812487	0.0181997	0.0138907	AGTR1/LIPC/PLA2G5/APOA4	4
BP	GO:0048880	sensory system development	10/152	369/18862	0.000834561	0.0183774	0.0140263	IGFN1/OBSL1/TH/TENM3/KERA/SALL2/SOX2/BMP7/NDP/FREM2	10
BP	GO:0060541	respiratory system development	7/152	188/18862	0.000838698	0.0183774	0.0140263	CCBE1/NOG/DLX5/SIX4/FGF18/TGFB3/LHX3	7
BP	GO:0001819	positive regulation of cytokine production	11/152	437/18862	0.000846234	0.0183774	0.0140263	CCBE1/MMP8/LEP/SLC11A1/MIR675/POSTN/H19/FCN1/LBP/ADIPOQ/CD36	11
BP	GO:0001823	mesonephros development	5/152	91/18862	0.000847766	0.0183774	0.0140263	NOG/SIX4/BMP7/TACSTD2/KIF26B	5
BP	GO:0001541	ovarian follicle development	4/152	53/18862	0.000873356	0.0187806	0.0143341	INHBB/PCYT1B/PTX3/VGF	4
BP	GO:0072006	nephron development	6/152	138/18862	0.000890058	0.0188384	0.0143781	NOG/SIX4/BMP7/TACSTD2/KIF26B/ADIPOQ	6
BP	GO:0098754	detoxification	6/152	138/18862	0.000890058	0.0188384	0.0143781	GPX3/MIR675/H19/BMP7/APOA4/CD36	6
BP	GO:0060037	pharyngeal system development	3/152	24/18862	0.000917108	0.0192593	0.0146994	NOG/SIX4/BMP7	3
BP	GO:1902882	regulation of response to oxidative stress	5/152	93/18862	0.000935319	0.0194894	0.014875	MIR675/H19/BMP7/GPR37/CD36	5
BP	GO:0060348	bone development	7/152	193/18862	0.000977753	0.0201402	0.0153717	LEP/DLX5/FGF18/TRPV4/COMP/TGFB3/MSX2	7
BP	GO:0050764	regulation of phagocytosis	5/152	94/18862	0.000981535	0.0201402	0.0153717	SLC11A1/PLA2G5/PTX3/ADIPOQ/CD36	5
BP	GO:0006720	isoprenoid metabolic process	6/152	143/18862	0.00107054	0.0217299	0.0165851	ALDH1A1/CYP2E1/CRABP2/TH/AKR1C4/APOA4	6
BP	GO:0071825	protein-lipid complex subunit organization	4/152	56/18862	0.00107518	0.0217299	0.0165851	AGTR1/LIPC/PLA2G5/APOA4	4
BP	GO:0060191	regulation of lipase activity	5/152	97/18862	0.00113039	0.0226752	0.0173066	AGTR1/LIPC/PLA2G5/APOA4/NTF4	5
BP	GO:0043271	negative regulation of ion transport	9/152	319/18862	0.00114661	0.0228302	0.0174249	KCNB1/LEP/INHBB/PRKG2/KCNH2/MAOB/RGS4/ADIPOQ/CD36	9
BP	GO:0006910	phagocytosis, recognition	5/152	98/18862	0.00118353	0.0233922	0.0178538	PLA2G5/FCN1/PTX3/LBP/CD36	5
BP	GO:0060675	ureteric bud morphogenesis	4/152	58/18862	0.00122662	0.0240668	0.0183686	NOG/SIX4/TACSTD2/KIF26B	4
BP	GO:1903426	regulation of reactive oxygen species biosynthetic process	5/152	99/18862	0.00123851	0.024124	0.0184123	MMP8/MIR675/H19/PTX3/CD36	5
BP	GO:0007409	axonogenesis	11/152	460/18862	0.00127934	0.0247326	0.0188768	NOG/CRABP2/DLX5/PLXNB3/SEMA3E/FLRT3/BMP7/CTNNA2/TUBB2B/SLIT1/LHX3	11
BP	GO:0010717	regulation of epithelial to mesenchymal transition	5/152	100/18862	0.00129535	0.0247326	0.0188768	NOG/ZNF750/BMP7/TGFB3/BAMBI	5
BP	GO:1902883	negative regulation of response to oxidative stress	3/152	27/18862	0.00130213	0.0247326	0.0188768	MIR675/H19/GPR37	3
BP	GO:0072171	mesonephric tubule morphogenesis	4/152	59/18862	0.00130767	0.0247326	0.0188768	NOG/SIX4/TACSTD2/KIF26B	4
BP	GO:0006631	fatty acid metabolic process	10/152	392/18862	0.00131576	0.0247326	0.0188768	CYP2E1/TH/LEP/LIPC/CES1/PLA2G5/AKR1C4/APOA4/ADIPOQ/CD36	10
BP	GO:0015908	fatty acid transport	6/152	150/18862	0.00136892	0.0255532	0.0195031	FABP4/SYT1/SNAP25/PLA2G5/THRSP/CD36	6
BP	GO:0046888	negative regulation of hormone secretion	4/152	60/18862	0.00139239	0.025812	0.0197006	KCNB1/LEP/INHBB/ADIPOQ	4
BP	GO:0006576	cellular biogenic amine metabolic process	5/152	103/18862	0.00147744	0.0268957	0.0205278	TH/HAND2/ACMSD/MAOB/GPR37	5
BP	GO:0048645	animal organ formation	4/152	61/18862	0.00148086	0.0268957	0.0205278	NOG/HAND2/BMP7/NTF4	4
BP	GO:1905330	regulation of morphogenesis of an epithelium	4/152	61/18862	0.00148086	0.0268957	0.0205278	NOG/SIX4/BMP7/TACSTD2	4
BP	GO:0030509	BMP signaling pathway	6/152	154/18862	0.00156577	0.0277004	0.0211419	NOG/DLX5/COMP/BMP7/TGFB3/BAMBI	6
BP	GO:1905039	carboxylic acid transmembrane transport	6/152	154/18862	0.00156577	0.0277004	0.0211419	SLC16A8/SLC7A10/SLC38A11/THRSP/RGS4/CD36	6
BP	GO:0042698	ovulation cycle	4/152	62/18862	0.00157319	0.0277004	0.0211419	PTPRN/LEP/PTX3/TGFB3	4
BP	GO:0060393	regulation of pathway-restricted SMAD protein phosphorylation	4/152	62/18862	0.00157319	0.0277004	0.0211419	NOG/INHBB/BMP7/TGFB3	4
BP	GO:0070374	positive regulation of ERK1 and ERK2 cascade	7/152	210/18862	0.00159097	0.0277004	0.0211419	HAND2/MARCO/FGF18/PLA2G5/CCL7/CCL8/CD36	7
BP	GO:0045940	positive regulation of steroid metabolic process	3/152	29/18862	0.00160761	0.0277004	0.0211419	AGTR1/CES1/APOA4	3
BP	GO:0055075	potassium ion homeostasis	3/152	29/18862	0.00160761	0.0277004	0.0211419	KCNMA1/KCNH2/CYP11B2	3
BP	GO:0060325	face morphogenesis	3/152	29/18862	0.00160761	0.0277004	0.0211419	NOG/DLX5/TGFB3	3
BP	GO:1903825	organic acid transmembrane transport	6/152	155/18862	0.00161818	0.0277049	0.0211454	SLC16A8/SLC7A10/SLC38A11/THRSP/RGS4/CD36	6
BP	GO:0023061	signal release	11/152	475/18862	0.00164972	0.0280662	0.0214211	PTPRN/KCNB1/AGTR1/LEP/SYT1/INHBB/SNAP25/MAOB/VGF/ADIPOQ/CHRNA3	11
BP	GO:0018958	phenol-containing compound metabolic process	5/152	106/18862	0.00167773	0.0281859	0.0215125	CYP2E1/TH/HAND2/MAOB/GPR37	5
BP	GO:0072009	nephron epithelium development	5/152	106/18862	0.00167773	0.0281859	0.0215125	NOG/SIX4/TACSTD2/KIF26B/ADIPOQ	5
BP	GO:0008045	motor neuron axon guidance	3/152	30/18862	0.00177575	0.0296473	0.0226279	NOG/SLIT1/LHX3	3
BP	GO:0006641	triglyceride metabolic process	5/152	108/18862	0.00182189	0.0302299	0.0230726	CYP2E1/FABP4/LIPC/THRSP/APOA4	5
BP	GO:0034614	cellular response to reactive oxygen species	6/152	159/18862	0.0018413	0.0303646	0.0231753	MIR675/H19/BMP7/GPR37/APOA4/CD36	6
BP	GO:0060389	pathway-restricted SMAD protein phosphorylation	4/152	65/18862	0.00187408	0.0307165	0.023444	NOG/INHBB/BMP7/TGFB3	4
BP	GO:0031214	biomineral tissue development	6/152	160/18862	0.00190056	0.0309618	0.0236312	LEP/OMD/PTH1R/COMP/BMP7/TGFB3	6
BP	GO:0010259	multicellular organism aging	3/152	31/18862	0.00195447	0.0315679	0.0240937	TH/LEP/COMP	3
BP	GO:0007626	locomotory behavior	6/152	161/18862	0.00196125	0.0315679	0.0240937	TH/SNAP25/KCND2/GPR37/NTF4/CHRNA3	6
BP	GO:0110148	biomineralization	6/152	162/18862	0.00202339	0.0323743	0.0247092	LEP/OMD/PTH1R/COMP/BMP7/TGFB3	6
BP	GO:0010812	negative regulation of cell-substrate adhesion	4/152	67/18862	0.00209547	0.0329393	0.0251405	SEMA3E/POSTN/SPOCK1/TACSTD2	4
BP	GO:0050766	positive regulation of phagocytosis	4/152	67/18862	0.00209547	0.0329393	0.0251405	SLC11A1/PLA2G5/PTX3/CD36	4
BP	GO:0072078	nephron tubule morphogenesis	4/152	67/18862	0.00209547	0.0329393	0.0251405	NOG/SIX4/TACSTD2/KIF26B	4
BP	GO:0045444	fat cell differentiation	7/152	221/18862	0.00212494	0.0332083	0.0253458	STEAP4/FABP4/LEP/INHBB/WIF1/BMP7/ADIPOQ	7
BP	GO:0048588	developmental cell growth	7/152	222/18862	0.0021796	0.0338658	0.0258476	CRABP2/SYT1/SEMA3E/FLRT3/POSTN/RGS4/SLIT1	7
BP	GO:0032956	regulation of actin cytoskeleton organization	9/152	352/18862	0.00224847	0.0347349	0.0265109	ARHGAP40/NEB/SEMA3E/MAGEL2/KANK4/CTNNA2/TACSTD2/TGFB3/RGS4	9
BP	GO:0072330	monocarboxylic acid biosynthetic process	7/152	224/18862	0.0022922	0.0349996	0.026713	CYP2E1/LIPC/CES1/ACMSD/AKR1C4/APOA4/ADIPOQ	7
BP	GO:0060485	mesenchyme development	8/152	287/18862	0.00231399	0.0349996	0.026713	NOG/HAND2/SIX4/SEMA3E/ZNF750/BMP7/TGFB3/BAMBI	8
BP	GO:0014823	response to activity	4/152	69/18862	0.0023343	0.0349996	0.026713	TH/LEP/POSTN/ADIPOQ	4
BP	GO:0072088	nephron epithelium morphogenesis	4/152	69/18862	0.0023343	0.0349996	0.026713	NOG/SIX4/TACSTD2/KIF26B	4
BP	GO:0060323	head morphogenesis	3/152	33/18862	0.00234458	0.0349996	0.026713	NOG/DLX5/TGFB3	3
BP	GO:0071772	response to BMP	6/152	167/18862	0.00235675	0.0349996	0.026713	NOG/DLX5/COMP/BMP7/TGFB3/BAMBI	6
BP	GO:0071773	cellular response to BMP stimulus	6/152	167/18862	0.00235675	0.0349996	0.026713	NOG/DLX5/COMP/BMP7/TGFB3/BAMBI	6
BP	GO:0048593	camera-type eye morphogenesis	5/152	115/18862	0.00239842	0.0354229	0.027036	IGFN1/OBSL1/TH/TENM3/BMP7	5
BP	GO:0007389	pattern specification process	10/152	426/18862	0.00242102	0.0355612	0.0271416	NOG/HOXC4/HAND2/HOXC6/HOXC9/MEOX2/EMX2/BMP7/NTF4/LHX3	10
BP	GO:0032371	regulation of sterol transport	4/152	70/18862	0.00246046	0.0357498	0.0272856	LEP/CES1/APOA4/ADIPOQ	4
BP	GO:0032374	regulation of cholesterol transport	4/152	70/18862	0.00246046	0.0357498	0.0272856	LEP/CES1/APOA4/ADIPOQ	4
BP	GO:0044060	regulation of endocrine process	3/152	34/18862	0.00255641	0.0369442	0.0281971	AGTR1/LEP/INHBB	3
BP	GO:0061333	renal tubule morphogenesis	4/152	71/18862	0.00259123	0.0372473	0.0284285	NOG/SIX4/TACSTD2/KIF26B	4
BP	GO:0003014	renal system process	5/152	118/18862	0.00268219	0.0381677	0.029131	AGTR1/KCNMA1/CYP11B2/ADIPOQ/CHRNA3	5
BP	GO:0048511	rhythmic process	8/152	294/18862	0.00268367	0.0381677	0.029131	PTPRN/TH/LEP/MAGEL2/PTX3/KCND2/TGFB3/ADIPOQ	8
BP	GO:0048762	mesenchymal cell differentiation	7/152	231/18862	0.00272199	0.038357	0.0292755	NOG/HAND2/SEMA3E/ZNF750/BMP7/TGFB3/BAMBI	7
BP	GO:0015909	long-chain fatty acid transport	4/152	72/18862	0.0027267	0.038357	0.0292755	FABP4/PLA2G5/THRSP/CD36	4
BP	GO:0060272	embryonic skeletal joint morphogenesis	2/152	10/18862	0.0027826	0.038357	0.0292755	NOG/BMP7	2
BP	GO:0060513	prostatic bud formation	2/152	10/18862	0.0027826	0.038357	0.0292755	NOG/BMP7	2
BP	GO:0070391	response to lipoteichoic acid	2/152	10/18862	0.0027826	0.038357	0.0292755	LBP/CD36	2
BP	GO:0071223	cellular response to lipoteichoic acid	2/152	10/18862	0.0027826	0.038357	0.0292755	LBP/CD36	2
BP	GO:0060193	positive regulation of lipase activity	4/152	73/18862	0.00286695	0.0393181	0.030009	AGTR1/PLA2G5/APOA4/NTF4	4
BP	GO:0046503	glycerolipid catabolic process	4/152	74/18862	0.00301205	0.0409259	0.0312361	FABP4/LIPC/PLA2G5/APOA4	4
BP	GO:0001990	regulation of systemic arterial blood pressure by hormone	3/152	36/18862	0.00301463	0.0409259	0.0312361	AGTR1/CES1/CYP11B2	3
BP	GO:0070372	regulation of ERK1 and ERK2 cascade	8/152	301/18862	0.00309805	0.041847	0.0319391	HAND2/MARCO/FGF18/PLA2G5/CCL7/CCL8/ADIPOQ/CD36	8
BP	GO:0032535	regulation of cellular component size	9/152	370/18862	0.00313472	0.0418573	0.031947	CRABP2/KCNMA1/ARHGAP40/NEB/SEMA3E/TRPV4/MAGEL2/KANK4/CTNNA2	9
BP	GO:1902903	regulation of supramolecular fiber organization	9/152	370/18862	0.00313472	0.0418573	0.031947	ARHGAP40/TRPV4/MAGEL2/KANK4/CTNNA2/NAV3/TACSTD2/TGFB3/RGS4	9
BP	GO:0008217	regulation of blood pressure	6/152	177/18862	0.00314571	0.0418573	0.031947	AGTR1/LEP/CES1/POSTN/CYP11B2/ADIPOQ	6
BP	GO:0046879	hormone secretion	8/152	302/18862	0.0031611	0.0418573	0.031947	PTPRN/KCNB1/AGTR1/LEP/INHBB/SNAP25/VGF/ADIPOQ	8
BP	GO:0006979	response to oxidative stress	10/152	444/18862	0.00325462	0.0428844	0.0327309	PTPRN/CYP2E1/GPX3/MIR675/H19/BMP7/GPR37/APOA4/ADIPOQ/CD36	10
BP	GO:0030500	regulation of bone mineralization	4/152	76/18862	0.00331716	0.0430973	0.0328934	OMD/COMP/BMP7/TGFB3	4
BP	GO:0006721	terpenoid metabolic process	5/152	124/18862	0.00332157	0.0430973	0.0328934	ALDH1A1/CYP2E1/CRABP2/AKR1C4/APOA4	5
BP	GO:0022604	regulation of cell morphogenesis	8/152	305/18862	0.00335627	0.0430973	0.0328934	OBSL1/SYT1/PLXNB3/SEMA3E/POSTN/CCL7/TACSTD2/BAMBI	8
BP	GO:0042416	dopamine biosynthetic process	2/152	11/18862	0.00338301	0.0430973	0.0328934	TH/GPR37	2
BP	GO:0061307	cardiac neural crest cell differentiation involved in heart development	2/152	11/18862	0.00338301	0.0430973	0.0328934	HAND2/BMP7	2
BP	GO:0061308	cardiac neural crest cell development involved in heart development	2/152	11/18862	0.00338301	0.0430973	0.0328934	HAND2/BMP7	2
BP	GO:1904478	regulation of intestinal absorption	2/152	11/18862	0.00338301	0.0430973	0.0328934	LEP/APOA4	2
BP	GO:0031345	negative regulation of cell projection organization	6/152	180/18862	0.00341689	0.0433236	0.0330662	PLXNB3/SEMA3E/TRPV4/ZNF365/SPOCK1/TACSTD2	6
BP	GO:0043407	negative regulation of MAP kinase activity	4/152	77/18862	0.00347732	0.0436057	0.0332814	UCHL1/BMP7/RGS4/ADIPOQ	4
BP	GO:0019433	triglyceride catabolic process	3/152	38/18862	0.00352025	0.0436057	0.0332814	FABP4/LIPC/APOA4	3
BP	GO:0042401	cellular biogenic amine biosynthetic process	3/152	38/18862	0.00352025	0.0436057	0.0332814	TH/HAND2/GPR37	3
BP	GO:0042417	dopamine metabolic process	3/152	38/18862	0.00352025	0.0436057	0.0332814	TH/MAOB/GPR37	3
BP	GO:0045429	positive regulation of nitric oxide biosynthetic process	3/152	38/18862	0.00352025	0.0436057	0.0332814	MMP8/PTX3/CD36	3
BP	GO:0060562	epithelial tube morphogenesis	8/152	309/18862	0.00363093	0.0447704	0.0341704	NOG/HAND2/SIX4/SEMA3E/CTHRC1/BMP7/TACSTD2/KIF26B	8
BP	GO:0003012	muscle system process	10/152	453/18862	0.0037497	0.0457957	0.034953	KCNMA1/LEP/HAND2/NEB/STAC/COMP/KCNH2/SCN3B/RGS4/CHRNA3	10
BP	GO:0009309	amine biosynthetic process	3/152	39/18862	0.00379129	0.0457957	0.034953	TH/HAND2/GPR37	3
BP	GO:0050892	intestinal absorption	3/152	39/18862	0.00379129	0.0457957	0.034953	LEP/APOA4/CD36	3
BP	GO:1904407	positive regulation of nitric oxide metabolic process	3/152	39/18862	0.00379129	0.0457957	0.034953	MMP8/PTX3/CD36	3
BP	GO:0006909	phagocytosis	9/152	381/18862	0.00379927	0.0457957	0.034953	LEP/SLC11A1/MARCO/PLA2G5/FCN1/PTX3/LBP/ADIPOQ/CD36	9
BP	GO:0009914	hormone transport	8/152	312/18862	0.00384813	0.0461776	0.0352444	PTPRN/KCNB1/AGTR1/LEP/INHBB/SNAP25/VGF/ADIPOQ	8
BP	GO:0034372	very-low-density lipoprotein particle remodeling	2/152	12/18862	0.00403821	0.0476084	0.0363364	LIPC/APOA4	2
BP	GO:0042340	keratan sulfate catabolic process	2/152	12/18862	0.00403821	0.0476084	0.0363364	OMD/KERA	2
BP	GO:0051956	negative regulation of amino acid transport	2/152	12/18862	0.00403821	0.0476084	0.0363364	LEP/RGS4	2
BP	GO:0060601	lateral sprouting from an epithelium	2/152	12/18862	0.00403821	0.0476084	0.0363364	NOG/BMP7	2
BP	GO:0071526	semaphorin-plexin signaling pathway	3/152	40/18862	0.00407473	0.0478291	0.0365049	HAND2/PLXNB3/SEMA3E	3
BP	GO:0140353	lipid export from cell	4/152	81/18862	0.00417057	0.0487412	0.0372011	AGTR1/LEP/SYT1/SNAP25	4
BP	GO:1905952	regulation of lipid localization	6/152	189/18862	0.00433531	0.0502072	0.03832	AGTR1/LEP/CES1/APOA4/ADIPOQ/CD36	6
BP	GO:0032970	regulation of actin filament-based process	9/152	389/18862	0.00434852	0.0502072	0.03832	ARHGAP40/NEB/SEMA3E/MAGEL2/KANK4/CTNNA2/TACSTD2/TGFB3/RGS4	9
BP	GO:0021983	pituitary gland development	3/152	41/18862	0.00437072	0.0502072	0.03832	NOG/SOX2/LHX3	3
BP	GO:0090278	negative regulation of peptide hormone secretion	3/152	41/18862	0.00437072	0.0502072	0.03832	KCNB1/LEP/INHBB	3
BP	GO:0070371	ERK1 and ERK2 cascade	8/152	320/18862	0.00447667	0.0512054	0.0390819	HAND2/MARCO/FGF18/PLA2G5/CCL7/CCL8/ADIPOQ/CD36	8
BP	GO:0032274	gonadotropin secretion	2/152	13/18862	0.00474729	0.0536164	0.040922	LEP/INHBB	2
BP	GO:0033605	positive regulation of catecholamine secretion	2/152	13/18862	0.00474729	0.0536164	0.040922	KCNB1/SYT1	2
BP	GO:0042415	norepinephrine metabolic process	2/152	13/18862	0.00474729	0.0536164	0.040922	TH/HAND2	2
BP	GO:0001508	action potential	5/152	135/18862	0.00476771	0.0536218	0.0409261	KCNB1/KCNH2/SCN3B/KCND2/CD36	5
BP	GO:0006638	neutral lipid metabolic process	5/152	136/18862	0.0049182	0.0548553	0.0418675	CYP2E1/FABP4/LIPC/THRSP/APOA4	5
BP	GO:0006639	acylglycerol metabolic process	5/152	136/18862	0.0049182	0.0548553	0.0418675	CYP2E1/FABP4/LIPC/THRSP/APOA4	5
BP	GO:0003002	regionalization	8/152	326/18862	0.00499781	0.055093	0.042049	NOG/HOXC4/HOXC6/HOXC9/MEOX2/EMX2/NTF4/LHX3	8
BP	GO:0030808	regulation of nucleotide biosynthetic process	3/152	43/18862	0.005001	0.055093	0.042049	MIR675/H19/ACMSD	3
BP	GO:0046189	phenol-containing compound biosynthetic process	3/152	43/18862	0.005001	0.055093	0.042049	TH/HAND2/GPR37	3
BP	GO:0046394	carboxylic acid biosynthetic process	8/152	327/18862	0.00508901	0.0558338	0.0426143	CYP2E1/LIPC/CES1/PLA2G5/ACMSD/AKR1C4/APOA4/ADIPOQ	8
BP	GO:1990778	protein localization to cell periphery	8/152	329/18862	0.00527524	0.057623	0.0439799	KCNB1/TESC/PRKG2/STAC/MRAP/SNAP25/SCN3B/ADIPOQ	8
BP	GO:0015804	neutral amino acid transport	3/152	44/18862	0.00533559	0.057623	0.0439799	LEP/SLC7A10/RGS4	3
BP	GO:0060324	face development	3/152	44/18862	0.00533559	0.057623	0.0439799	NOG/DLX5/TGFB3	3
BP	GO:0032760	positive regulation of tumor necrosis factor production	4/152	87/18862	0.00537664	0.057623	0.0439799	MMP8/LEP/LBP/CD36	4
BP	GO:1903531	negative regulation of secretion by cell	5/152	139/18862	0.00538989	0.057623	0.0439799	KCNB1/LEP/INHBB/MAOB/ADIPOQ	5
BP	GO:0010771	negative regulation of cell morphogenesis involved in differentiation	2/152	14/18862	0.00550934	0.057623	0.0439799	POSTN/TACSTD2	2
BP	GO:0010872	regulation of cholesterol esterification	2/152	14/18862	0.00550934	0.057623	0.0439799	AGTR1/APOA4	2
BP	GO:0010935	regulation of macrophage cytokine production	2/152	14/18862	0.00550934	0.057623	0.0439799	TGFB3/CD36	2
BP	GO:0034370	triglyceride-rich lipoprotein particle remodeling	2/152	14/18862	0.00550934	0.057623	0.0439799	LIPC/APOA4	2
BP	GO:0072498	embryonic skeletal joint development	2/152	14/18862	0.00550934	0.057623	0.0439799	NOG/BMP7	2
BP	GO:0097284	hepatocyte apoptotic process	2/152	14/18862	0.00550934	0.057623	0.0439799	MIR675/H19	2
BP	GO:1900025	negative regulation of substrate adhesion-dependent cell spreading	2/152	14/18862	0.00550934	0.057623	0.0439799	POSTN/TACSTD2	2
BP	GO:0072080	nephron tubule development	4/152	88/18862	0.005598	0.0581383	0.0443732	NOG/SIX4/TACSTD2/KIF26B	4
BP	GO:0072503	cellular divalent inorganic cation homeostasis	10/152	480/18862	0.00560187	0.0581383	0.0443732	AGTR1/JPH3/SLC11A1/PTH1R/FAM155A/TRPV4/SCGN/CCL7/CCL8/CD36	10
BP	GO:0060986	endocrine hormone secretion	3/152	45/18862	0.00568334	0.058757	0.0448455	AGTR1/LEP/INHBB	3
BP	GO:0033273	response to vitamin	4/152	89/18862	0.00582536	0.0590191	0.0450455	LEP/BCHE/POSTN/BMP7	4
BP	GO:0046849	bone remodeling	4/152	89/18862	0.00582536	0.0590191	0.0450455	LEP/PTH1R/CTHRC1/TGFB3	4
BP	GO:0016053	organic acid biosynthetic process	8/152	335/18862	0.00586533	0.0590191	0.0450455	CYP2E1/LIPC/CES1/PLA2G5/ACMSD/AKR1C4/APOA4/ADIPOQ	8
BP	GO:0060284	regulation of cell development	10/152	485/18862	0.00601233	0.0590191	0.0450455	NOG/OBSL1/CRABP2/PLXNB3/SEMA3E/POSTN/BMP7/ZNF365/TACSTD2/ADIPOQ	10
BP	GO:0003044	regulation of systemic arterial blood pressure mediated by a chemical signal	3/152	46/18862	0.00604438	0.0590191	0.0450455	AGTR1/CES1/CYP11B2	3
BP	GO:0010171	body morphogenesis	3/152	46/18862	0.00604438	0.0590191	0.0450455	NOG/DLX5/TGFB3	3
BP	GO:0050919	negative chemotaxis	3/152	46/18862	0.00604438	0.0590191	0.0450455	SEMA3E/FLRT3/SLIT1	3
BP	GO:0003073	regulation of systemic arterial blood pressure	4/152	90/18862	0.00605881	0.0590191	0.0450455	AGTR1/CES1/POSTN/CYP11B2	4
BP	GO:0046470	phosphatidylcholine metabolic process	4/152	90/18862	0.00605881	0.0590191	0.0450455	LIPC/PCYT1B/PLA2G5/APOA4	4
BP	GO:0061326	renal tubule development	4/152	90/18862	0.00605881	0.0590191	0.0450455	NOG/SIX4/TACSTD2/KIF26B	4
BP	GO:1903557	positive regulation of tumor necrosis factor superfamily cytokine production	4/152	90/18862	0.00605881	0.0590191	0.0450455	MMP8/LEP/LBP/CD36	4
BP	GO:0048592	eye morphogenesis	5/152	143/18862	0.00606745	0.0590191	0.0450455	IGFN1/OBSL1/TH/TENM3/BMP7	5
BP	GO:0048754	branching morphogenesis of an epithelial tube	5/152	143/18862	0.00606745	0.0590191	0.0450455	NOG/SIX4/SEMA3E/BMP7/TACSTD2	5
BP	GO:0030001	metal ion transport	10/152	486/18862	0.00609718	0.0590191	0.0450455	CACHD1/JPH3/SLC11A1/STAC/CATSPER1/FAM155A/TRPV4/KCNH2/RGS4/CCL8	10
BP	GO:0009952	anterior/posterior pattern specification	6/152	203/18862	0.00610993	0.0590191	0.0450455	NOG/HOXC4/HOXC6/HOXC9/MEOX2/EMX2	6
BP	GO:0035051	cardiocyte differentiation	5/152	144/18862	0.00624578	0.0590191	0.0450455	OBSL1/HAND2/NEB/BMP7/RGS4	5
BP	GO:0106106	cold-induced thermogenesis	5/152	144/18862	0.00624578	0.0590191	0.0450455	ALDH1A1/FABP4/LEP/ADIPOQ/CD36	5
BP	GO:0120161	regulation of cold-induced thermogenesis	5/152	144/18862	0.00624578	0.0590191	0.0450455	ALDH1A1/FABP4/LEP/ADIPOQ/CD36	5
BP	GO:0010934	macrophage cytokine production	2/152	15/18862	0.00632348	0.0590191	0.0450455	TGFB3/CD36	2
BP	GO:0030852	regulation of granulocyte differentiation	2/152	15/18862	0.00632348	0.0590191	0.0450455	TESC/ADIPOQ	2
BP	GO:0034638	phosphatidylcholine catabolic process	2/152	15/18862	0.00632348	0.0590191	0.0450455	LIPC/PLA2G5	2
BP	GO:0042053	regulation of dopamine metabolic process	2/152	15/18862	0.00632348	0.0590191	0.0450455	MAOB/GPR37	2
BP	GO:0042069	regulation of catecholamine metabolic process	2/152	15/18862	0.00632348	0.0590191	0.0450455	MAOB/GPR37	2
BP	GO:0043584	nose development	2/152	15/18862	0.00632348	0.0590191	0.0450455	DLX5/SIX4	2
BP	GO:0044793	negative regulation by host of viral process	2/152	15/18862	0.00632348	0.0590191	0.0450455	PTX3/CCL8	2
BP	GO:0060572	morphogenesis of an epithelial bud	2/152	15/18862	0.00632348	0.0590191	0.0450455	NOG/BMP7	2
BP	GO:0072075	metanephric mesenchyme development	2/152	15/18862	0.00632348	0.0590191	0.0450455	SIX4/BMP7	2
BP	GO:1900121	negative regulation of receptor binding	2/152	15/18862	0.00632348	0.0590191	0.0450455	NOG/ADIPOQ	2
BP	GO:0030073	insulin secretion	6/152	207/18862	0.00670209	0.0621935	0.0474683	PTPRN/KCNB1/LEP/INHBB/SNAP25/VGF	6
BP	GO:0098742	cell-cell adhesion via plasma-membrane adhesion molecules	7/152	273/18862	0.006733	0.0621935	0.0474683	IGFN1/OBSL1/TENM3/PLXNB3/FLRT3/PCDHB8/ADIPOQ	7
BP	GO:0110053	regulation of actin filament organization	7/152	273/18862	0.006733	0.0621935	0.0474683	ARHGAP40/MAGEL2/KANK4/CTNNA2/TACSTD2/TGFB3/RGS4	7
BP	GO:0010862	positive regulation of pathway-restricted SMAD protein phosphorylation	3/152	48/18862	0.00680686	0.0622341	0.0474993	INHBB/BMP7/TGFB3	3
BP	GO:0046461	neutral lipid catabolic process	3/152	48/18862	0.00680686	0.0622341	0.0474993	FABP4/LIPC/APOA4	3
BP	GO:0046464	acylglycerol catabolic process	3/152	48/18862	0.00680686	0.0622341	0.0474993	FABP4/LIPC/APOA4	3
BP	GO:0072659	protein localization to plasma membrane	7/152	275/18862	0.00699698	0.0637556	0.0486606	KCNB1/TESC/PRKG2/STAC/MRAP/SCN3B/ADIPOQ	7
BP	GO:0042632	cholesterol homeostasis	4/152	94/18862	0.00705471	0.0638487	0.0487317	FABP4/LIPC/CES1/APOA4	4
BP	GO:0070167	regulation of biomineral tissue development	4/152	94/18862	0.00705471	0.0638487	0.0487317	OMD/COMP/BMP7/TGFB3	4
BP	GO:0030728	ovulation	2/152	16/18862	0.00718883	0.0644693	0.0492053	LEP/INHBB	2
BP	GO:0061548	ganglion development	2/152	16/18862	0.00718883	0.0644693	0.0492053	SIX4/RGS4	2
BP	GO:0062197	cellular response to chemical stress	8/152	347/18862	0.00719524	0.0644693	0.0492053	GPX3/TRPV4/MIR675/H19/BMP7/GPR37/APOA4/CD36	8
BP	GO:0072507	divalent inorganic cation homeostasis	10/152	499/18862	0.00728755	0.0645081	0.049235	AGTR1/JPH3/SLC11A1/PTH1R/FAM155A/TRPV4/SCGN/CCL7/CCL8/CD36	10
BP	GO:0051960	regulation of nervous system development	9/152	422/18862	0.00729868	0.0645081	0.049235	NOG/OBSL1/CRABP2/PLXNB3/SEMA3E/FLRT3/BMP7/ZNF365/SLIT1	9
BP	GO:0001666	response to hypoxia	8/152	348/18862	0.00731555	0.0645081	0.049235	KCNMA1/TH/LEP/POSTN/BMP7/KCND2/TGFB3/ADIPOQ	8
BP	GO:0055092	sterol homeostasis	4/152	95/18862	0.00731956	0.0645081	0.049235	FABP4/LIPC/CES1/APOA4	4
BP	GO:0060840	artery development	4/152	95/18862	0.00731956	0.0645081	0.049235	NOG/LEP/HAND2/COMP	4
CC	GO:0062023	collagen-containing extracellular matrix	15/156	423/19520	1.58616e-06	0.000356886	0.000310553	MMP8/OMD/SERPINA5/FRAS1/COMP/POSTN/CTHRC1/FCN1/BMP7/COL9A3/TGFB3/APOA4/ADIPOQ/NDP/FREM2	15
CC	GO:0005581	collagen trimer	7/156	87/19520	6.22352e-06	0.000700146	0.00060925	CCBE1/MARCO/GLDN/CTHRC1/FCN1/COL9A3/ADIPOQ	7
CC	GO:0034702	ion channel complex	10/156	301/19520	0.00015822	0.0118665	0.010326	KCNB1/CACHD1/KCNMA1/TTYH1/CATSPER1/SNAP25/KCNH2/SCN3B/KCND2/CHRNA3	10
CC	GO:1902495	transmembrane transporter complex	10/156	323/19520	0.000278828	0.0156841	0.0136479	KCNB1/CACHD1/KCNMA1/TTYH1/CATSPER1/SNAP25/KCNH2/SCN3B/KCND2/CHRNA3	10
CC	GO:1990351	transporter complex	10/156	338/19520	0.000399083	0.0158818	0.01382	KCNB1/CACHD1/KCNMA1/TTYH1/CATSPER1/SNAP25/KCNH2/SCN3B/KCND2/CHRNA3	10
CC	GO:0034703	cation channel complex	8/156	222/19520	0.000423515	0.0158818	0.01382	KCNB1/CACHD1/KCNMA1/CATSPER1/SNAP25/KCNH2/SCN3B/KCND2	8
CC	GO:0044306	neuron projection terminus	6/156	130/19520	0.000624718	0.0200802	0.0174733	PTPRN/TH/SYT1/SCGN/FLRT3/SCRG1	6
CC	GO:0008076	voltage-gated potassium channel complex	5/156	89/19520	0.000739504	0.020282	0.0176489	KCNB1/KCNMA1/SNAP25/KCNH2/KCND2	5
CC	GO:0005788	endoplasmic reticulum lumen	9/156	306/19520	0.000811279	0.020282	0.0176489	F5/BCHE/LIPC/CES1/F10/ARSI/COL9A3/VGF/APOA4	9
CC	GO:0034705	potassium channel complex	5/156	99/19520	0.0011955	0.0268988	0.0234066	KCNB1/KCNMA1/SNAP25/KCNH2/KCND2	5
CC	GO:0042581	specific granule	6/156	160/19520	0.00182622	0.0373545	0.0325049	MMP8/MCEMP1/SNAP25/PTX3/LILRA3/CD36	6
CC	GO:0070820	tertiary granule	6/156	164/19520	0.00206836	0.0387817	0.0337469	MMP8/MCEMP1/SLC11A1/SNAP25/PTX3/LILRA3	6
CC	GO:0070821	tertiary granule membrane	4/156	73/19520	0.0027851	0.0482036	0.0419456	MCEMP1/SLC11A1/SNAP25/LILRA3	4
MF	GO:0005539	glycosaminoglycan binding	10/151	228/18337	1.9701e-05	0.00464869	0.00396129	LYVE1/LIPC/SERPINA5/COMP/POSTN/HABP2/BMP7/CCL7/CCL8/SLIT1	10
MF	GO:0022836	gated channel activity	12/151	337/18337	2.33017e-05	0.00464869	0.00396129	KCNB1/CACHD1/KCNMA1/TTYH1/CATSPER1/FAM155A/TRPV4/SNAP25/KCNH2/SCN3B/KCND2/CHRNA3	12
MF	GO:0048018	receptor ligand activity	14/151	486/18337	5.02691e-05	0.00517647	0.00441103	LEP/INHBB/FGF18/SEMA3E/ENDOU/FLRT3/BMP7/CCL7/TGFB3/VGF/CCL8/ADIPOQ/NDP/NTF4	14
MF	GO:0030546	signaling receptor activator activity	14/151	492/18337	5.73545e-05	0.00517647	0.00441103	LEP/INHBB/FGF18/SEMA3E/ENDOU/FLRT3/BMP7/CCL7/TGFB3/VGF/CCL8/ADIPOQ/NDP/NTF4	14
MF	GO:0008201	heparin binding	8/151	164/18337	6.48681e-05	0.00517647	0.00441103	LIPC/SERPINA5/COMP/POSTN/BMP7/CCL7/CCL8/SLIT1	8
MF	GO:0005261	cation channel activity	11/151	333/18337	0.00010065	0.00669322	0.00570349	KCNB1/CACHD1/KCNMA1/CATSPER1/FAM155A/TRPV4/SNAP25/KCNH2/SCN3B/KCND2/CHRNA3	11
MF	GO:0001664	G protein-coupled receptor binding	10/151	289/18337	0.000143741	0.00767369	0.00653898	AGTR1/MARCO/UCHL1/MRAP/CTHRC1/FCN1/CCL7/CCL8/BAMBI/NDP	10
MF	GO:0022843	voltage-gated cation channel activity	7/151	139/18337	0.000153858	0.00767369	0.00653898	KCNB1/CACHD1/KCNMA1/CATSPER1/SNAP25/KCNH2/KCND2	7
MF	GO:0046873	metal ion transmembrane transporter activity	12/151	425/18337	0.000211848	0.00767506	0.00654015	KCNB1/CACHD1/KCNMA1/TTYH1/SLC11A1/CATSPER1/FAM155A/TRPV4/SNAP25/KCNH2/SCN3B/KCND2	12
MF	GO:0005244	voltage-gated ion channel activity	8/151	197/18337	0.00023062	0.00767506	0.00654015	KCNB1/CACHD1/KCNMA1/CATSPER1/SNAP25/KCNH2/SCN3B/KCND2	8
MF	GO:0022832	voltage-gated channel activity	8/151	197/18337	0.00023062	0.00767506	0.00654015	KCNB1/CACHD1/KCNMA1/CATSPER1/SNAP25/KCNH2/SCN3B/KCND2	8
MF	GO:0005216	ion channel activity	12/151	429/18337	0.000230829	0.00767506	0.00654015	KCNB1/CACHD1/KCNMA1/TTYH1/CATSPER1/FAM155A/TRPV4/SNAP25/KCNH2/SCN3B/KCND2/CHRNA3	12
MF	GO:0008083	growth factor activity	7/151	162/18337	0.000392682	0.0120523	0.0102701	INHBB/FGF18/ENDOU/BMP7/TGFB3/VGF/NTF4	7
MF	GO:0015267	channel activity	12/151	477/18337	0.000597844	0.0161982	0.0138029	KCNB1/CACHD1/KCNMA1/TTYH1/CATSPER1/FAM155A/TRPV4/SNAP25/KCNH2/SCN3B/KCND2/CHRNA3	12
MF	GO:0022803	passive transmembrane transporter activity	12/151	478/18337	0.000608954	0.0161982	0.0138029	KCNB1/CACHD1/KCNMA1/TTYH1/CATSPER1/FAM155A/TRPV4/SNAP25/KCNH2/SCN3B/KCND2/CHRNA3	12
MF	GO:0005249	voltage-gated potassium channel activity	5/151	87/18337	0.000760973	0.0189768	0.0161707	KCNB1/KCNMA1/SNAP25/KCNH2/KCND2	5
MF	GO:0031406	carboxylic acid binding	7/151	184/18337	0.000837501	0.0190413	0.0162257	CRABP2/FABP4/TH/SERPINA5/FCN1/AKR1C4/ADIPOQ	7
MF	GO:0038187	pattern recognition receptor activity	3/151	23/18337	0.000859006	0.0190413	0.0162257	MARCO/FCN1/CD36	3
MF	GO:0005160	transforming growth factor beta receptor binding	3/151	24/18337	0.000975822	0.0204923	0.0174621	TGFB3/RASL11B/BAMBI	3
MF	GO:0030247	polysaccharide binding	3/151	25/18337	0.00110223	0.0219894	0.0187379	CLEC4G/ENDOU/PTX3	3
MF	GO:1901681	sulfur compound binding	8/151	260/18337	0.00142578	0.0270898	0.0230841	LIPC/SERPINA5/COMP/POSTN/BMP7/CCL7/CCL8/SLIT1	8
MF	GO:0017147	Wnt-protein binding	3/151	30/18337	0.00188799	0.0318854	0.0271705	APCDD1L/WIF1/CTHRC1	3
MF	GO:0046943	carboxylic acid transmembrane transporter activity	6/151	157/18337	0.00192334	0.0318854	0.0271705	SLC16A8/SLCO1A2/SLC7A10/SLC38A11/AKR1C4/CD36	6
MF	GO:0005342	organic acid transmembrane transporter activity	6/151	158/18337	0.00198593	0.0318854	0.0271705	SLC16A8/SLCO1A2/SLC7A10/SLC38A11/AKR1C4/CD36	6
MF	GO:0031210	phosphatidylcholine binding	3/151	31/18337	0.00207775	0.0318854	0.0271705	SERPINA5/PCYT1B/APOA4	3
MF	GO:0050997	quaternary ammonium group binding	3/151	31/18337	0.00207775	0.0318854	0.0271705	SERPINA5/PCYT1B/APOA4	3
MF	GO:0008028	monocarboxylic acid transmembrane transporter activity	4/151	69/18337	0.00252235	0.0372747	0.0317629	SLC16A8/SLCO1A2/AKR1C4/CD36	4
MF	GO:0033293	monocarboxylic acid binding	4/151	71/18337	0.00279924	0.0386072	0.0328983	CRABP2/FABP4/SERPINA5/AKR1C4	4
MF	GO:0005201	extracellular matrix structural constituent	6/151	170/18337	0.0028633	0.0386072	0.0328983	FRAS1/COMP/POSTN/CTHRC1/COL9A3/ADIPOQ	6
MF	GO:0005381	iron ion transmembrane transporter activity	2/151	10/18337	0.00290279	0.0386072	0.0328983	TTYH1/SLC11A1	2
MF	GO:0005267	potassium channel activity	5/151	120/18337	0.00316148	0.0406913	0.0346743	KCNB1/KCNMA1/SNAP25/KCNH2/KCND2	5
MF	GO:0005125	cytokine activity	7/151	235/18337	0.00336808	0.0418889	0.0356948	INHBB/BMP7/CCL7/TGFB3/CCL8/ADIPOQ/NDP	7
MF	GO:0005109	frizzled binding	3/151	37/18337	0.00346449	0.0418889	0.0356948	CTHRC1/BAMBI/NDP	3
MF	GO:0022839	ion gated channel activity	3/151	42/18337	0.00496766	0.0582969	0.0496766	KCNMA1/TTYH1/CATSPER1	3

## Sheet: GODOWN
ONTOLOGY	ID	Description	GeneRatio	BgRatio	pvalue	p.adjust	qvalue	geneID	Count
BP	GO:0042403	thyroid hormone metabolic process	3/39	26/18862	2.05602e-05	0.0128295	0.0107779	CRYM/DUOX2/DUOXA2	3
CC	GO:0043020	NADPH oxidase complex	2/42	12/19520	0.000294243	0.0173603	0.0139378	NOX1/DUOX2	2
MF	GO:0016175	superoxide-generating NAD(P)H oxidase activity	2/42	11/18337	0.000278021	0.0355867	0.0307286	NOX1/DUOX2	2
MF	GO:0050664	oxidoreductase activity, acting on NAD(P)H, oxygen as acceptor	2/42	16/18337	0.000602199	0.0385408	0.0332794	NOX1/DUOX2	2
