# Supplementary material for: The novel angiogenesis regulator circFAM169A promotes the metastasis of colorectal cancer through the angiopoietin-2 signaling axis
Source: Aging (Albany NY). 2023 Aug 23;15(16):8367–83. doi: 10.18632/aging.204974 (PMC10496999; doi:10.18632/aging.204974)
Supplement: Supplementary Table 3 [file aging-15-204974-s004.xlsx]

## Sheet: Sheet1
Supplementary Table 3. Data from the online databases circBank, CircInteractome and TargetScan.
CircInteractome	circbank	targetscan
hsa-miR-518a-5p	hsa-miR-518a-5p	hsa-miR-518a-5p
hsa-miR-450b-3p	hsa-miR-450b-3p	hsa-miR-450b-3p
hsa-miR-647	hsa-miR-647	hsa-miR-647
hsa-miR-583	hsa-miR-583	hsa-miR-583
hsa-miR-1253	hsa-miR-1253	hsa-miR-1253
hsa-miR-769-3p	hsa-miR-769-3p	hsa-miR-7159-5p
hsa-miR-527	hsa-miR-527	hsa-miR-6719-3p
hsa-miR-1276	hsa-miR-7159-5p	hsa-miR-17-5p
hsa-miR-1290	hsa-miR-6719-3p	hsa-miR-3681-5p
hsa-miR-604	hsa-miR-17-5p	hsa-miR-4768-5p
hsa-miR-638	hsa-miR-3681-5p	hsa-miR-4427
hsa-miR-1225-5p	hsa-miR-4768-5p	hsa-miR-181a-2-3p
hsa-miR-555	hsa-miR-4427	hsa-miR-3651
hsa-miR-338-5p	hsa-miR-181a-2-3p	hsa-miR-6507-3p
hsa-miR-1278	hsa-miR-3651	hsa-miR-7110-3p
hsa-miR-338-3p	hsa-miR-6507-3p	hsa-miR-3182
hsa-miR-766	hsa-miR-7110-3p	hsa-miR-3611
hsa-miR-545	hsa-miR-3182	hsa-miR-34a-3p
hsa-miR-383	hsa-miR-3611	hsa-miR-4700-3p
hsa-miR-136	hsa-miR-34a-3p	hsa-miR-4697-3p
hsa-miR-223	hsa-miR-4700-3p	hsa-miR-3192-3p
hsa-miR-1178	hsa-miR-4697-3p	hsa-miR-3607-5p
hsa-miR-1228	hsa-miR-3192-3p	hsa-miR-4311
hsa-miR-1252	hsa-miR-3607-5p	hsa-miR-7843-3p
hsa-miR-580	hsa-miR-4311	hsa-miR-3692-3p
hsa-miR-494	hsa-miR-7843-3p	hsa-miR-6768-5p
hsa-miR-1227	hsa-miR-3692-3p	hsa-miR-4639-3p
	hsa-miR-6768-5p	hsa-miR-136-5p
	hsa-miR-4639-3p	hsa-miR-3183
	hsa-miR-136-5p	hsa-miR-4691-5p
	hsa-miR-3183	hsa-miR-3065-5p
	hsa-miR-4691-5p	hsa-miR-6878-3p
	hsa-miR-3065-5p	hsa-miR-4461
	hsa-miR-6878-3p	hsa-miR-3686
	hsa-miR-4461	hsa-miR-4511
	hsa-miR-3686	hsa-miR-6769a-3p
	hsa-miR-4511	hsa-miR-1276
	hsa-miR-6769a-3p	hsa-miR-1290
	hsa-miR-6833-3p	hsa-miR-604
	hsa-miR-6744-3p	hsa-miR-638
	hsa-miR-761	hsa-miR-1225-5p
	hsa-miR-519b-3p	hsa-miR-555
	hsa-miR-526b-3p	hsa-miR-338-5p
	hsa-miR-519c-3p	hsa-miR-1278
	hsa-miR-19a-3p	hsa-miR-338-3p
	hsa-miR-19b-3p	hsa-miR-576-3p
	hsa-miR-6856-5p	hsa-miR-5197-3p
	hsa-miR-519a-3p	hsa-miR-4743-3p
	hsa-miR-93-5p	hsa-miR-6871-5p
	hsa-miR-519d-3p	hsa-miR-1273d
	hsa-miR-20b-5p	hsa-miR-5586-3p
	hsa-miR-106b-5p	hsa-miR-3622a-5p
	hsa-miR-20a-5p	hsa-miR-5190
	hsa-miR-106a-5p	hsa-miR-889-5p
	hsa-miR-302d-3p	hsa-miR-4712-3p
		hsa-miR-20b-3p
		hsa-miR-374b-3p
		hsa-miR-4310
		hsa-miR-3127-5p
		hsa-miR-4524b-3p
		hsa-miR-3180-5p
		hsa-miR-1266-3p
		hsa-miR-3200-5p
		hsa-miR-4782-5p
		hsa-miR-548ah-5p
		hsa-miR-4698
		hsa-miR-515-5p
		hsa-miR-2115-5p
		hsa-miR-222-5p
		hsa-miR-633
		hsa-miR-3123
		hsa-miR-922
		hsa-miR-1273g-3p
		hsa-miR-3617-3p
		hsa-miR-1252-5p
		hsa-miR-4772-5p
		hsa-miR-6764-3p
		hsa-miR-4786-3p
		hsa-miR-4777-3p
		hsa-miR-6817-3p
		hsa-miR-5089-5p
		hsa-miR-3977
		hsa-miR-568
		hsa-miR-335-3p
		hsa-miR-6814-5p
		hsa-miR-5096
		hsa-miR-505-3p.2
		hsa-miR-4695-3p
		hsa-miR-3622a-3p
		hsa-miR-202-3p
		hsa-miR-6793-3p
		hsa-miR-4314
		hsa-miR-4773
		hsa-miR-4256
		hsa-miR-4480
		hsa-miR-33b-3p
		hsa-miR-4635
		hsa-miR-6795-3p
		hsa-miR-2276-3p
		hsa-miR-3163
		hsa-miR-6892-3p
		hsa-miR-5692a
		hsa-miR-4668-3p
		hsa-miR-516b-5p
		hsa-miR-5696
		hsa-miR-545-3p
		hsa-miR-1261
		hsa-miR-9-5p
		hsa-miR-3943
		hsa-miR-6773-3p
		hsa-miR-489-3p
		hsa-miR-7-3p
		hsa-miR-4323
		hsa-miR-6800-3p
		hsa-miR-378j
		hsa-miR-651-3p
		hsa-miR-125a-3p
		hsa-miR-512-3p
		hsa-miR-642-3p
		hsa-miR-5197-5p
		hsa-miR-4659a-3p
		hsa-miR-193a-5p
		hsa-miR-135-5p
		hsa-miR-2278
		hsa-miR-4790-3p
		hsa-let-7a-3p
		hsa-miR-3691-5p
		hsa-miR-4503
		hsa-miR-6753-3p
		hsa-miR-3607-3p
		hsa-miR-580-3p
		hsa-miR-3653-3p
		hsa-miR-6864-5p
		hsa-miR-6823-5p
		hsa-miR-548b-3p
		hsa-miR-6771-3p
		hsa-miR-6868-5p
		hsa-miR-6730-3p
		hsa-miR-6826-5p
		hsa-miR-127-5p
		hsa-miR-5092
		hsa-miR-516a-3p
		hsa-miR-6842-3p
		hsa-miR-4742-3p
		hsa-miR-589-3p
		hsa-miR-4495
		hsa-miR-6867-3p
		hsa-miR-548aw
		hsa-miR-1257
		hsa-miR-6126
		hsa-miR-3973
		hsa-miR-494-3p
		hsa-miR-5683
		hsa-miR-4789-5p
		hsa-miR-200ab-5p
		hsa-miR-3074-5p
		hsa-miR-210-5p
		hsa-miR-6776-3p
		hsa-miR-4708-3p
		hsa-miR-3934-5p
		hsa-miR-223-3p
		hsa-miR-142-5p
		hsa-miR-1238-3p
		hsa-miR-4307
		hsa-miR-451b
		hsa-let-7f-2-3p
		hsa-miR-766-3p
		hsa-miR-330-3p
		hsa-miR-4761-5p
		hsa-miR-186-3p
		hsa-miR-6838-3p
		hsa-miR-6861-5p
		hsa-miR-548ap-3p
		hsa-miR-4720-5p
		hsa-miR-6758-3p
		hsa-miR-1-3p
		hsa-miR-4281
		hsa-miR-380-3p
		hsa-miR-6511-3p
		hsa-miR-193-3p
		hsa-miR-3149
		hsa-miR-3128
		hsa-miR-892b
		hsa-miR-7159-3p
		hsa-miR-4715-3p
		hsa-miR-8063
		hsa-miR-8056
		hsa-miR-6777-3p
		hsa-miR-4696
		hsa-miR-6758-5p
		hsa-miR-518e-3p
		hsa-miR-4724-5p
		hsa-miR-302a-5p
		hsa-miR-411-3p
		hsa-miR-514a-3p
		hsa-miR-1229-5p
		hsa-miR-1227-3p
		hsa-miR-4753-3p
		hsa-miR-15b-3p
		hsa-miR-3925-5p
		hsa-miR-4645-3p
		hsa-miR-30-3p
		hsa-miR-371b-3p
		hsa-miR-1224-3p
		hsa-miR-370-3p
		hsa-miR-3074-3p
		hsa-miR-5094
		hsa-miR-2276-5p
		hsa-miR-298
		hsa-miR-3909
		hsa-miR-6072
		hsa-miR-5585-3p
		hsa-miR-3914
		hsa-miR-4279
		hsa-miR-335-5p
		hsa-miR-513b-5p
		hsa-miR-5589-3p
		hsa-miR-4438
		hsa-miR-4713-5p
		hsa-miR-16-2-3p
		hsa-miR-3151-3p
		hsa-miR-141-3p
		hsa-miR-136-3p
		hsa-miR-1255b-2-3p
		hsa-let-7-5p
		hsa-miR-486-5p
		hsa-miR-376b-5p
		hsa-miR-1245b-3p
		hsa-miR-506-5p
		hsa-miR-6749-3p
		hsa-miR-1182
		hsa-miR-1827
		hsa-miR-1299
		hsa-miR-892-5p
		hsa-miR-215-3p
		hsa-miR-371a-3p
		hsa-miR-6762-3p
		hsa-miR-876-5p
		hsa-miR-6845-3p
		hsa-miR-3137
		hsa-miR-6776-5p
		hsa-miR-524-5p
		hsa-miR-543
		hsa-miR-4291
		hsa-miR-140-3p.1
		hsa-miR-3664-5p
		hsa-miR-764
		hsa-miR-6806-5p
		hsa-miR-4713-3p
		hsa-miR-626
		hsa-miR-548ay-3p
		hsa-miR-4501
		hsa-miR-4803
		hsa-miR-3064-3p
		hsa-miR-1228-3p
		hsa-miR-106a-3p
		hsa-miR-302-3p
		hsa-miR-302c-3p.2
		hsa-miR-6765-3p
		hsa-miR-4772-3p
		hsa-miR-3925-3p
		hsa-miR-4286
		hsa-miR-4652-3p
		hsa-miR-487-3p
		hsa-miR-3660
		hsa-miR-6887-3p
		hsa-miR-421
		hsa-miR-4506
		hsa-miR-641
		hsa-miR-4804-3p
		hsa-miR-19-3p
		hsa-miR-4530
		hsa-miR-579-3p
		hsa-miR-1178-5p
		hsa-miR-518c-5p
		hsa-miR-4796-3p
		hsa-miR-582-3p
		hsa-miR-340-5p
		hsa-miR-6507-5p
		hsa-miR-6873-3p
		hsa-miR-495-3p
		hsa-miR-3942-3p
		hsa-miR-4482-3p
		hsa-miR-6728-5p
		hsa-miR-4757-5p
		hsa-miR-4289
		hsa-miR-548aq-3p
		hsa-miR-425-5p
		hsa-miR-1207-3p
		hsa-miR-520g-3p
		hsa-miR-889-3p
		hsa-miR-2054
		hsa-miR-135b-3p
		hsa-miR-7109-3p
		hsa-miR-548ai
		hsa-miR-31-3p
		hsa-miR-2682-3p
		hsa-miR-1909-5p
		hsa-miR-548ac
		hsa-miR-194-3p
		hsa-miR-7152-5p
		hsa-miR-519-3p
		hsa-miR-5580-3p
		hsa-miR-484
		hsa-miR-6770-5p
		hsa-miR-670-3p
		hsa-miR-4276
		hsa-miR-4680-3p
		hsa-miR-6720-5p
		hsa-miR-214-3p
		hsa-miR-514a-5p
		hsa-miR-4720-3p
		hsa-miR-24-5p
		hsa-miR-326
		hsa-miR-873-5p.1
		hsa-miR-5693
		hsa-miR-526b-5p
		hsa-miR-4714-5p
		hsa-miR-2355-5p
		hsa-miR-548as-3p
		hsa-miR-4527
		hsa-miR-590-3p
		hsa-miR-1178-3p
		hsa-miR-383-5p.1
		hsa-miR-7641
		hsa-miR-5187-3p
		hsa-miR-5582-5p
		hsa-miR-4666a-5p
		hsa-miR-6784-3p
		hsa-miR-6809-3p
		hsa-miR-4749-3p
		hsa-miR-6875-3p
		hsa-miR-1285-5p
		hsa-miR-539-5p
		hsa-miR-141-5p
