# Supplementary material for: The novel angiogenesis regulator circFAM169A promotes the metastasis of colorectal cancer through the angiopoietin-2 signaling axis
Source: Aging (Albany NY). 2023 Aug 23;15(16):8367–83. doi: 10.18632/aging.204974 (PMC10496999; doi:10.18632/aging.204974)
Supplement: Supplementary Table 4 [file aging-15-204974-s005.xlsx]

## Sheet: Sheet1
Supplementary Table 4. Intersection information of the three gene sets.
COR	Target Scan	UP-mRNA
MAP6	C11orf82	PSG8
CRMP1	BTC	MIR3120
TH	C1orf21	MUM1L1
CACNA1C	RBMS2	CXorf57
CLGN	S100G	CREG2
DIRAS2	COX20	F10
SLC38A11	APOBEC3C	RP11-1096G20.5
TTYH1	PITPNC1	CDON
FXYD6	ARL5B	F5
CRIP2	SSX1	NOG
NBEA	SSX3	LEP
SLCO1A2	IDUA	PTPRN
MAGED4	BTF3	COL5A2
CTNNA2	TMEM106B	PLS3
ARL8A	SSX4	PCDHGA8
TNFRSF19	SSX4B	RP11-81K13.1
GABARAPL2	TUBA3C	RP11-689K5.3
GTF2I	GAGE1	RP11-57P19.1
SNCA	LYZ	COL4A3BP
INSIG2	SALL1	RP11-88E10.4
NOG	AC011997.1	DIRAS2
CYP11B2	G6PC2	RP11-395F4.1
OBSCN	SSX2B	PCDHB12
MME	SSX2	RP11-791G15.2
SLC2A3	SREK1IP1	SLAMF9
SERINC1	KRTAP2-4	MPP4
IRF2BPL	CT62	RP11-499O7.7
OBSL1	NCBP2	ARHGEF4
KL	GPC3	DNM3-IT1
KIDINS220	SDC2	METTL24
SYT1	SSX7	MMP8
ARHGEF4	RNASE2	ASAP1-IT2
RASSF9	RNASE3	LOC400927
PRR36	KRTAP9-3	SLC28A1
SPEF1	IMPA1	SLC39A10
ANXA9	ACSL4	RP1-5O6.4
PCGF2	KRTAP21-2	GUCY1A2
KRT34	RAP1A	AC009404.2
PDZRN4	DOCK10	PLAG1
NDRG4	RBKS	COMMD3-BMI1
WSB1	HUS1B	RIMS4
NXPH3	CHIC2	FTO-IT1
PTPRU	ACVR1	KCNB1
GJC1	SPRR2D	RDH12
MAP2	LFNG	SMIM10L2B
ANGPT2	SPRR2A	CTF1
	KIAA0101	MKL2
	PRRG4	AC007128.1
	PCBD1	PGM5P2
	KRTAP9-4	CRABP2
	FN3KRP	KB-7G2.9
	SATB2	LOC400927-CSNK1E
	C4orf45	PPP1R1C
	COA5	DPYSL4
	DYNLL2	RP11-65L3.4
	SLC27A2	PCSK5
	DECR2	NOV
	ITGAE	WASF3
	AQP8	SERPINA5
	MCOLN3	SNAP25
	CCL2	AKR1C2
	USO1	LYPD1
	RPP14	INHBB
	HBEGF	PGM5
	WRB	OR13D1
	SSX5	RP11-680F20.12
	CARD18	STEAP4
	C4orf46	KCNE4
	DCK	RP11-1136G4.2
	LAMTOR3	LINC01566
	AC011294.3	PIGH
	KRTAP9-6	CYTL1
	ZC4H2	SCUBE3
	GPM6B	LOC101929608
	ATP5L	CTB-96E2.10
	ELL2	RP11-171I2.4
	SYPL1	TOR1AIP1
	ZBTB20	GPRIN1
	SRD5A1	RP11-171I2.2
	ZNF547	ZNF821
	SEPW1	ANGPTL4
	EDIL3	ADSSL1
	CDH19	ESPNL
	GTF2A2	GALR2
	ZDHHC21	CHST13
	VAMP4	ANGPTL1
	ATG12	ZNF333
	TUBE1	LOC100507377
	C7orf49	PDZK1
	ERLIN2	DMRT3
	C11orf70	RP11-65L3.3
	EEA1	CC2D2A
	UBE2A	AVPR1A
	NXNL2	C14orf37
	KRTAP9-8	SBSN
	RPL22	MIR6855
	GPD2	AC005481.5
	JRKL	ZNF638
	CCDC59	ADGRB3
	GOLGA5	LINC00623
	TMED3	RP11-1110F20.1
	SPATA18	CTD-2326C4.1
	VAPA	ZFHX4-AS1
	ARV1	VTCN1
	KRTAP9-2	RP4-799P18.4
	HSPA1A	RP3-323A16.1
	PABPC3	KIAA1467
	SFI1	THSD1
	C21orf49	RP3-449M8.9
	RP11-45H22.3	MIR145
	TBX15	BSN
	PREP	ADAMTS5
	TMED7	FAM13C
	ST20-MTHFS	C1orf185
	CNOT7	CTB-147C13.1
	METTL23	RP11-281P23.2
	SPRR2E	PLXNB3
	NAAA	DNM3
	TRIQK	FAM20B
	ISM1	ASGR1
	NDUFB6	PLN
	CENPW	CCBE1
	GTF2H5	AOC2
	AOAH	TMC1
	THAP8	NPPB
	KIAA2018	HTR1F
	MRPL35	CTB-167B5.2
	SLFN12	SALL2
	PHF20	RNF112
	LANCL3	SCN3B
	FNDC3B	SMIM10L2A
	SNAPC5	RP11-840I19.3
	CHURC1	TMEM17
	HSDL2	PTX3
	MTHFS	HOXD-AS2
	IL20	AP001885.1
	KRTAP1-5	RP11-318A15.8
	CD33	CTB-193M12.1
	BET1L	UVRAG
	NAALADL2	LOC284865
	KRT26	RP11-353M9.1
	POLR2M	PCDHA8
	MAP1LC3B2	A2ML1
	TFRC	MYL3
	MAFK	BCHE
	FBXO28	DLX5
	RAD9B	TMEM65
	RP6-24A23.6	LINC00312
	RAP2B	CYP17A1-AS1
	PLCXD2	MIR638
	CLVS1	HAND2
	CCDC63	PPP1R1A
	SLPI	UBR5
	ACTR3	KCNQ3
	EVA1A	AC007319.1
	C5orf56	ANGPT2
	MB	CASC10
	MYL2	SRPX
	TAS2R14	RP11-492A10.1
	C22orf31	DCUN1D3
	PUM1	PRKG2
	HSD17B11	SUCO
	SERINC3	TENM1
	CCNA2	DPY19L2
	C1GALT1C1	DPP4
	FRG1B	GTF2A1
	C4orf32	TRIM23
	CDC42EP5	CATSPER1
	C9orf85	AGPAT1
	CDR2	RP11-16E18.3
	SPIN3	CPO
	SLC22A2	EHBP1
	UBBP4	lncRNA-ATB
	KCNIP4	RP11-790J24.1
	CHRM2	CHD8
	PPTC7	APLP2
	SPIDR	AC018890.6
	BAALC	RP13-516M14.8
	TBC1D19	LPPR4
	UCHL5	FER
	EPC2	ELMOD1
	RAB23	FABP4
	OGFOD2	RP11-456D7.1
	RNASEH2B	DVL3
	POU3F2	RP11-647K16.1
	RFESD	CNTFR
	ZNF404	RP11-256I23.1
	KATNBL1	AC007064.24
	LOH12CR2	FAM205BP
	TESC	CH17-189H20.1
	CLEC3A	FGF11
	TNFSF11	SMIM10
	NUP54	STON2
	SLC35A5	XXYLT1
	CCR6	CASKIN2
	PRSS23	SERPINA4
	CTNNBIP1	CTA-339C12.1
	BLOC1S2	ZFYVE16
	CCDC38	STK32A
	ARL4D	BAALC
	ZNF880	GDAP1
	TMEM167B	RAB9B
	INSIG1	SNCA
	EPHA6	RP11-893F2.14
	TMEM18	CLASP1
	MED12	LINC00588
	ATOH1	RP11-496H1.2
	DMGDH	SLC19A2
	GBP5	RBP7
	RP11-826N14.2	CTAG1A
	KLHL13	LINC01606
	LOR	HOXA4
	SLC25A48	LOC103091866
	MAP1LC3B	APCDD1L
	RP11-1026M7.2	CACHD1
	OTOGL	LINC01198
	IL5RA	PEG10
	MTRNR2L4	BEAN1
	SPO11	CHPF
	STX3	P3H4
	NHLRC2	PCYT1B
	GCOM1	RP11-400F19.18
	C10orf71	LPPR2
	DKK3	TCEAL4
	G3BP1	LINC01116
	FGF1	CAMSAP2
	FAS	SLC38A11
	RHOH	RN7SKP57
	MYO6	RAB3C
	IFT74	RP11-171I2.5
	ACAD8	TTYH1
	CENPF	INTS4P2
	BAAT	GDF5
	IMMT	AC007098.1
	C11orf21	MAMDC2
	AC008964.1	NCKAP5
	PCTP	LBP
	MEF2C	ADAMTS6
	ZNF197	GPR135
	NFYC	RP11-314C9.1
	BMPR2	ACVR1
	PLAC8	NPTXR
	TBC1D13	AC002398.12
	NANP	ABCC9
	ENTPD1	BCL6
	GTDC1	RP11-92C4.6
	MRPL44	ARMCX5-GPRASP2
	LPPR5	AKR1C1
	RPS6KA3	MAP1B
	PTDSS1	COBLL1
	JDP2	SLC23A2
	CYP2E1	RP11-141B14.2
	KRTAP1-3	NGFRAP1
	NPHP3	JPH3
	ZCCHC24	LINC00640
	MPZL3	ZMYND8
	ZCCHC17	P4HA1
	ARPC2	XIAP-AS1
	NFKBIZ	FKBP10
	SCAPER	RP13-766D20.4
	ZNF626	KRT9
	UBE2E3	PCNXL4
	KIAA1377	LYVE1
	TTC19	CASC1
	PLK4	PI15
	CLPTM1L	SLC16A10
	MKX	OBSL1
	EDA	CLVS1
	MOG	ADCY1
	PFKFB4	C2orf27A
	C1orf180	ITGA7
	FAM216B	TMEM132C
	LRRC10	DYNC1I1
	NSG1	LOC101928036
	ZNF83	LOC101060019
	GTF2A1	ZFHX4
	ELK4	OSTM1
	GSTA2	ART5
	CDCA7	WWC2
	PNPLA2	LOC100128714
	C6orf120	OPCML-IT2
	THSD7A	ELF5
	CYSLTR1	AKAP6
	FOXI1	MTMR2
	RCAN1	RP11-342K2.1
	AC008443.1	EBF2
	CDC16	AC008269.2
	KRT2	NEDD8
	SPTSSB	PCDHB10
	DAZ3	LINC01545
	TMEM123	ANKRD6
	RHOB	DPP6
	BRF2	CWC27
	C15orf61	RP11-477H21.2
	PLEKHF2	FNDC3B
	TMEM47	HTR7P1
	UCHL3	TCEAL1
	JAM2	RP11-597D13.2
	CXorf24	LOC101926913
	PAFAH1B2	WDPCP
	RMND5A	PRKAA2
	APOB	ENPEP
	PHF10	UBTD2
	PPAPDC1A	TIMP4
	STX7	NTS
	UBE2D3	RP11-442O1.3
	ZFP28	CMYA5
	RGS5	HOTS
	LHX9	SYPL2
	RBM8A	RP11-464F9.21
	PDGFD	LINC00260
	CNKSR3	RP1-78O14.1
	ALDH6A1	RP11-355F16.1
	CRLS1	CCDC114
	SLC37A2	UCHL1
	RGS21	RP11-648O15.2
	CTSL	SNAPC1
	LSM5	ASPG
	PRPF39	CELA2A
	ACTR10	HOXC4
	EZH2	RN7SKP145
	HBP1	MIR624
	EDN3	MIR556
	OXGR1	C14orf180
	KARS	ULBP1
	MAP6D1	CTC-543D15.7
	GLS	SMN2
	GGT7	CTD-2583P5.1
	C9orf116	NAP1L6
	TRAPPC3L	TRABD2B
	DAZL	RP11-817I4.2
	UBE2Q2	CPA4
	RSL24D1	CUX1
	C11orf57	RP11-97E7.1
	L3MBTL3	PJA2
	RPRD1A	AC005618.6
	CA5B	MME
	ATXN10	MTMR1
	GPATCH2L	LOC100506178
	CERKL	ADRA2C
	HRK	MIR26A1
	CTBS	SPRTN
	RAB18	PRSS50
	H2AFY	RGS4
	FCRL2	LOC100507661
	CCNK	CTC-482H14.5
	TMED5	HRH2
	FYTTD1	CACNA2D4
	GPX8	CEP63
	CES3	AR
	HMGB1	MC1R
	LEPROTL1	AL121578.2
	SRSF12	STK38L
	OSTF1	AGTR1
	VPS29	SNORA14A
	UQCRB	RP11-49O14.3
	CABYR	KIF5C
	RP11-113D6.6	TNFRSF19
	MBD3L1	SLC39A9
	VBP1	ZNF346-IT1
	ID2	CFL2
	FBXW12	AC006262.5
	IL22RA1	ATL1
	C1QL2	CABYR
	NKX6-1	TMEM233
	DAZ4	PCDHB11
	FP15737	AP003041.1
	CCNYL1	RP11-353N4.6
	DGKE	CHSY3
	EDEM1	ODAM
	IRS4	MYPN
	NAA30	LOC101927229
	ALPK1	GPX3
	NGFRAP1	BMPR2
	EZR	MIR500B
	FOXN3	LOC400043
	OLR1	PACRG
	GNAI3	RDH11
	SEC11A	C7orf71
	ZIC1	LOC100506603
	TADA2A	INSIG2
	SPTLC2	SP5
	THPO	SPP1
	RCN2	TMEM121
	NSUN3	PLOD2
	RFC5	RAB23
	RPS19	RP11-146F11.5
	MED31	SERINC1
	HCN1	PEAR1
	ASGR2	RP11-157L3.12
	ZNF430	AC034187.2
	DAZ2	ARL6
	MOGAT2	FCN1
	SYNPR	NPR3
	SYNE1	RP11-71J2.1
	GAPT	CU024913.5
	C12orf40	SYT1
	TP53TG3D	LIMS3
	TMEM71	KRTAP1-4
	GPRC6A	VEGFC
	LRRC6	ERCC3
	PTPN11	CYYR1
	NECAP2	TSPAN18
	SERPINA5	FCN2
	CACNG6	CBX6
	WISP3	CTC-463A16.1
	MBIP	RAPGEF4
	UBE2G2	PAIP2
	MRPL17	CTD-2292M16.8
	SLC30A9	LINC00622
	PHLDA3	AP4S1
	RPL26L1	ADGRF5
	NUDT11	COL27A1
	ATG5	CDC14A
	GTF2H3	RP11-432J9.3
	CMPK2	FLJ41200
	MDFIC	VAMP4
	FUBP1	AFAP1L1
	SESN3	DOCK1
	CPSF6	IL1RAP
	ZCWPW2	AIP
	MSTO1	MCEMP1
	CA12	AC106874.1
	TACR2	HDGFRP3
	PHF14	RP11-326A19.4
	HKDC1	ASB4
	SPG20	MIR183
	TRNP1	RP11-305O6.3
	POLR1B	PAPPA
	ABCB11	RP11-65J21.3
	SAP25	ZNF462
	LRRC63	VWF
	SMOX	ANKRD46
	GPR85	GOPC
	GDA	RP11-110I1.14
	B4GALT5	TSEN15
	RPS4Y1	LRRC70
	PAN2	RP11-618G20.1
	HSPA1B	CP
	RP11-47I22.4	RP11-242J7.1
	YPEL2	RP11-349F21.4
	LAPTM4B	ZSCAN26
	SLC22A24	SPOCD1
	RBL1	CFAP58
	CTSK	NTF4
	AL441883.1	GDF11
	TMED2	FAM101B
	KIAA1671	CCDC116
	GPR64	WDFY3-AS2
	FAM118A	ELOVL3
	MIER3	RP11-124L9.5
	METTL7A	NAV1
	PPP1R15B	MIR30C2
	NBEAL1	HOXC6
	EYA4	RP11-107M16.2
	TCEANC	SPIN1
	PPP4R4	GPR158
	AQP4	AC116035.1
	TMEM261	GAD1
	CYP27B1	NPHP1
	ARL8B	MLLT11
	ARL14EP	ITGA5
	FBXL5	TSPAN10
	HMOX2	ACTN1
	HIST1H2AE	GNAZ
	SEMA3A	SPAG11A
	NFAM1	RP11-677M24.1
	PKD2L1	CTD-2320G14.2
	ANGPTL1	RAB11FIP2
	MMP8	POLK
	LSM14A	KLF3-AS1
	SUPV3L1	CERK
	AKAP10	RSF1
	UGT1A7	RP11-65L3.2
	UGT1A6	CTD-2538G9.5
	UGT1A10	FUT1
	HDAC6	CTD-2311B13.2
	UGT1A9	STRN3
	UGT1A3	COQ10B
	UGT1A4	LINC00626
	UGT1A5	IRF2BPL
	DHRS13	RNF180
	SMIM17	LOC101927472
	DET1	LOC100506844
	UGT1A1	RP11-307B6.3
	UGT1A8	RP11-702L15.4
	EFCAB1	OSBPL10
	SCN4B	FKBP14
	HOXA6	XXyac-YR29IB3.1
	ATAD3C	RP11-317P15.5
	RAC1	CXorf36
	VMA21	GRB14
	ECT2	TMEM67
	PTS	PDE3A
	SDHD	CTB-12A17.2
	CNPY1	RP11-536G4.2
	HAUS8	MAPK14
	CAMK2N1	AC005009.1
	SLC30A7	CTD-3252C9.2
	RUFY3	MED6
	EBF1	ISM1
	TRIM23	UBTD1
	RCOR1	RAI14
	PTP4A1	EXOC6B
	HIST1H2BN	LINC00940
	TXNDC5	RP11-55L4.2
	CLIP1	RP11-575F12.2
	TMEM218	RN7SL417P
	ABCB1	ATP6V0A4
	KIAA1468	NGFR
	MOB1A	PLCG1-AS1
	PAPD4	CTC-487M23.7
	HDAC2	NCALD
	TRMT112	PCDH17
	DIMT1	CTA-797E19.1
	BAG2	AC083884.8
	NFU1	LOC101928201
	PPBP	MEOX2
	PFN4	ARID4B
	ITLN2	MAOB
	ULK1	PACSIN3
	CD84	RP11-353N4.5
	DNAI1	AQP7P1
	SPP1	FCGRT
	RASSF8	LOC100130357
	TBX4	ZNF879
	ORAOV1	MFAP3
	COPS3	LOC100652999
	LPIN1	POC5
	CTSE	TMEM194B
	UFD1L	RP11-21M24.2
	PDHB	TMEM45A
	CA3	RASL11B
	ITM2A	SLC2A3
	PCBD2	RP11-438D8.2
	LCE1B	CACNA1C
	PGAP2	MIR1468
	ID4	RP11-944L7.4
	POU4F2	RP13-1016M1.2
	MCL1	CAP2
	RP11-383H13.1	TROVE2
	FAM196B	NOTCH2
	CEP70	MIR5687
	PLEKHA1	AE000662.93
	DSC3	NFE2
	COX7A2L	IQSEC1
	TMEM19	ZNF100
	PABPC4L	ADGRL4
	C6orf62	SCP2D1
	PARP8	ANKRD2
	PSD3	P4HA2
	KCTD20	BRAF
	TMOD2	ADAMTSL2
	GMFB	RP11-1C8.6
	TMOD3	RP11-462D18.4
	GNG10	CAHM
	SEC63	SCFD1
	UGT2B4	FST
	SLC39A14	AC006458.3
	PSMD12	SUSD2
	TBCEL	RP11-845M18.7
	PLEKHA3	SUSD5
	PDE4DIP	HSD11B1L
	MAPK14	MIR7151
	MMGT1	DPPA3
	RIOK2	SLC11A1
	EIF4E3	RP11-171I2.3
	NUP133	RP11-120M18.5
	LGALSL	LOC101928489
	GDAP1	CTD-2555O16.1
	THAP1	HOOK3
	SVIP	AC004231.2
	PLA2G16	CDK17
	SMIM20	KB-1639H6.2
	ZMAT4	LDLRAD3
	TGIF2LX	CLCNKB
	RP11-362K2.2	AC242209.2
	DEFB118	SLC16A8
	DAZ1	NOTCH3
	IL1R1	TJP1
	ZNF488	GPATCH11
	REP15	RP11-689C9.1
	CADM4	NOVA2
	CPNE4	RDH16
	AKIRIN1	GS1-393G12.14
	MARCKS	SLC15A1
	PSMD5	PRKD1
	KCTD21	CCDC81
	FRAT1	TAS2R43
	SRBD1	XAGE1E
	MSRB2	AL391001.1
	KSR2	KIF3A
	TRO	FAM179B
	ZNF440	RP11-215P8.4
	SRPX	RP11-85G21.2
	CXXC4	CRLF1
	AL020996.1	HOXC9
	FKBP7	LINC01096
	METTL15	ADRA1B
	MST4	SLC38A9
	C2orf88	MSX2
	HAL	MYT1
	ATP6V1D	HSP90B1
	CAMTA1	RP11-23D5.1
	GIMAP6	PLB1
	BUB3	AC007326.10
	HSPA2	MMD
	SS18L1	OBSCN
	HELZ	AC064874.1
	PAX6	CTB-174D11.3
	ADAM9	ANXA9
	ETS2	RP11-711C17.2
	ZSCAN32	RP11-503G7.1
	CCDC77	SLC2A14
	HPGD	ZHX1
	TMED6	GALNT14
	TMEM45B	TFPI
	IMPAD1	OR5T1
	TOMM7	ACE
	SLC2A5	RP11-80I15.4
	ADRBK2	MIR550B1
	NCK1	CDH10
	SMLR1	MIR454
	TCF4	CCL8
	FBXO34	RP11-256I23.2
	PLA2G12A	CCL7
	DNAH14	RP11-23P13.4
	SNCAIP	TMED7
	PKIA	RP11-612J15.1
	SMYD2	ARMCX2
	ANAPC13	OSBPL8
	SMDT1	ZNF117
	PDLIM3	CHGB
	MKNK1	WT1
	BDH1	MAGED4
	GNA14	LINC00888
	PRKACB	CEP126
	KRT24	LHX3
	ZAR1L	MYL6B
	SOX21	CIDEC
	CHODL	RALGPS2
	CDHR3	HEY1
	AC068987.1	RP11-473M10.3
	LOXL4	CH17-118O6.3
	RPLP0	RP11-36B6.1
	CEP250	GGCX
	POLE4	PLXND1
	FASTKD3	SCG2
	NPEPL1	CTD-2631K10.1
	TMEM169	THSD7B
	NEUROD1	CTD-3220F14.2
	CMYA5	MIR218-1
	GCSAML	SNN
	CYSTM1	KIF26B
	RP11-169F17.1	PCOLCE2
	FXYD3	TSPAN2
	B3GAT2	RP11-681H18.2
	EEF1E1	DACT3
	IDI1	MARCO
	ABHD2	EPPIN
	SERINC5	RGL2
	MIS12	FZD10
	SMYD3	PLIN4
	SSR1	ELAVL1
	AC012215.1	XXbac-BPG13B8.10
	CHIC1	AOC3
	MTMR2	IBSP
	FAM76B	TPM2
	GNAT1	PTK7
	PHAX	AC073257.2
	ATP2C1	RP1-142L7.5
	PNN	H1F0
	YY1	FGF18
	PTAR1	SAP130
	FOPNL	MIR7854
	ZNF483	AS3MT
	AGMO	C3orf14
	TMEM251	KCNJ8
	SIRT5	CTD-2017C7.2
	CNIH4	RP11-338E21.2
	COQ7	CCDC15
	ZNF788	RP5-1050D4.2
	RPL10A	ABL2
	CYR61	MIR675
	HIST1H3B	PON3
	TRAF6	RWDD1
	SUPT7L	ITGB1BP2
	SLC25A21	SLCO1A2
	HLX	BVES
	SRSF7	RP11-50D16.4
	CSRP2BP	KDELC1
	COPS8	RP11-543B16.3
	C15orf32	TH
	NUDT4	mascRNA
	TP53AIP1	PPL
	ZBTB46	PPFIBP1
	RP11-676J12.7	CERS3-AS1
	FCER1A	MIR143HG
	CTH	ZNF660
	CLEC3B	KALRN
	AL136531.1	B3GNT2
	KIAA0087	ANO5
	TPD52L3	MMP24
	IQCK	PXDN
	MMP13	RP11-307O10.1
	MUM1L1	ISYNA1
	SMYD1	LOC101927272
	NOXRED1	ZNF365
	GSTA3	HBQ1
	LANCL1	XXyac-YM21GA2.4
	DHRSX	CD36
	CPLX1	PIKFYVE
	PPIL1	MAP7D3
	SPRR1A	STX6
	SCN2B	BAMBI
	CXCL14	RP11-370K11.1
	KRTAP2-3	CCDC85A
	USP10	CD81-AS1
	SOCS3	ZFAND3
	FRMPD2	TM9SF1
	C3orf58	GJA5
	LHPP	DISP1
	DCUN1D4	MRAP
	PAX9	H19
	CHST11	SFTPD
	KLHL3	PTPN14
	CMTM8	GLB1L
	PRDM5	BRMS1L
	FBXL20	SEZ6L2
	RPL13A	ZNF512B
	MFF	TMEM135
	TARDBP	NRP2
	FNDC3A	LGI3
	SMIM15	CHML
	SLC25A37	RP11-594N15.2
	SZRD1	RP11-140H17.2
	SLC9B2	NMNAT3
	IKZF5	FOLH1B
	UNC50	VWA1
	ZDHHC24	RP3-425C14.4
	CBX5	CTB-181H17.1
	AC007461.1	HOXD4
	TRIM36	RBPMS2
	POC1B-GALNT4	FKBP1B
	RGS18	AC002044.3
	PDCD10	LINC00524
	PSMD14	SLC7A2
	NAA11	ARHGAP40
	NAA38	GRIN3B
	ZNF480	RP11-710E1.2
	SPARC	RP11-680F8.4
	USP14	CCDC82
	TGIF2LY	SOX17
	ACOT2	MIR3926-2
	OTC	NDRG4
	CNGA3	CES1
	ROR1	MARK3
	CLIC2	TTC5
	ANKRD18A	C3orf18
	MYH2	MIR7-1
	EIF2D	FAF2
	TM7SF3	PNMA2
	SLC5A9	NAV3
	MRPS6	RP11-506O24.2
	LONRF1	TRIM6
	SLC35A3	MIR4484
	INO80D	LCA5
	EOMES	FBXL13
	LPXN	HDAC9
	AL133373.1	CCDC154
	RXFP1	FBXO38
	VGLL4	KIAA1324L
	RFK	TSPYL1
	PELI1	HECW2
	SLC10A2	LOC101927550
	NAB2	AC093850.2
	SYNJ2	SYT17
	TUBA3D	ATP2A2
	PHF6	KIAA1462
	TUBGCP2	RC3H1-IT1
	ANKRD18B	PCSK2
	ATPIF1	BAIAP3
	SLC30A6	RP11-573N10.1
	PIK3R4	RP5-915N17.11
	GPR27	S100A7L2
	CXorf23	EMX2
	PADI1	RP11-68I18.10
	ADRB2	RP11-490B18.5
	GCNT3	SLC6A19
	RAB8B	RP11-322E11.5
	KRTAP4-12	DDIT4L
	IMPDH1	RP11-145A3.1
	FAM20B	IST1
	PFDN1	PHYHIP
	CACNB4	OR3A2
	ARL6	RP11-572M11.1
	PRKAR2B	GPR17
	CHRDL1	DMRTC1
	ZNF677	GDF10
	PTCD2	FGF13
	PQLC3	USP13
	EPHB6	PCDHB15
	ST3GAL2	SLC7A10
	SGOL2	MAST1
	SLC35D1	PRICKLE2
	CSNK1A1	RGN
	DEK	RASSF8
	AGO4	CUBN
	ANKH	PRAME
	KRT15	RP11-90B22.1
	KCNK1	SLC4A3
	BICD2	MUCL1
	NDUFS1	ARL10
	FUNDC1	NUMB
	YIPF5	CPLX2
	UBE2QL1	MIR4435-2
	RHEB	SLC39A1
	TLE4	RFK
	DNAJC10	ABCC2
	S1PR1	AP1S2
	CACUL1	FRAS1
	TCEAL8	CTC-366B18.2
	RBM14	RP11-350N15.6
	CPZ	LINC01193
	FGF12	ENDOU
	RP11-664D7.4	RP11-71E19.1
	SLC38A9	MCFD2
	SRD5A3	RP11-999E24.3
	C14orf28	RP11-256I23.3
	SNRPB2	CHRNB2
	GNG11	C8orf48
	IQUB	MIR3685
	SLCO1B1	RECK
	FAM69C	GPR146
	CCDC179	CTD-3214K23.1
	NOSTRIN	PHF21A
	VPS4B	PRNCR1
	DAPK2	AKT3
	ABHD5	DDX59
	SUPT16H	KL
	GKAP1	NAP1L5
	SLC16A6	PDZD7
	LCE2B	LOX
	PFN1	RP11-180C16.1
	FAM169A	RP11-274H2.3
	SMCO1	CALB2
	CTC-349C3.1	LOXL3
	BIN3	MAML2
	RBP1	GABRB3
	MEI4	SMA5
	GCG	RN7SKP194
	GSTA1	BHLHB9
	MSL3	AC122136.2
	TUBA3E	CDH6
	CHST12	RP11-173M1.7
	ERICH1	HSPB7
	GIMAP7	SCRG1
	PFN2	ZNF385C
	KCNV1	MIR6850
	TOMM40L	PYGL
	ZNF226	BEX5
	AGGF1	PCDHB18P
	CEP57L1	SERPINE1
	EPB41L4A	TRAK2
	BTBD1	RP11-130L8.1
	RBM3	CTD-2008E3.1
	MTAP	HDX
	SULT2A1	RP11-196H14.4
	SH3D19	CRNDE
	RAET1E	AGBL5-AS1
	DNAJC25-GNG10	RP11-335O4.3
	DNAJC25	FZD6
	RALA	GAGE1
	SKAP2	FGFR1
	WDR43	GRIN2C
	TCEANC2	SNW1
	SPPL2A	RN7SKP184
	AGTRAP	ZNF532
	MIER1	TM4SF18
	LETMD1	RP11-66H6.4
	SLC15A2	CNPY3
	RBM26	RBM27
	N4BP2L2	RIT1
	ZNF280D	NRXN3
	CYP26A1	LOC101929565
	SP3	SEMA3G
	C12orf23	RP11-384O8.1
	MMADHC	HEY2
	ZNRF2	RP4-584D14.7
	TFB1M	EPB41L1
	ARSK	ARL4D
	AGBL3	PRSS23
	SNX2	VCAN-AS1
	HNRNPA0	C9orf24
	SELK	RP4-585I14.3
	GNRHR	GAS1
	LRP2	SYCP2L
	PARK2	MAGEL2
	C21orf62	SIRPA
	UBR1	FAM168A
	SEMA3E	ZNF426
	MMP24	MIR642A
	AADACL2	SDCCAG8
	AGR3	RP11-17A1.3
	SPTLC1	ALPK2
	NDUFA11	IGSF11
	GATA3	JPH2
	NFIL3	PRPF3
	INHBC	HYALP1
	ATE1	LRCH2
	KPNA5	RP11-379F4.9
	TMEM236	AP000997.2
	TMEM236	MAP4K5
	OPRL1	LOC100133050
	CSGALNACT1	HAS2
	DDX24	RP11-332H17.1
	SQLE	TMEFF1
	BMPR1A	SLC38A6
	H3F3C	TAS2R19
	SLC9C1	AC092634.2
	RSPH10B2	GUCA1B
	ART3	RP11-846E15.1
	MYLK4	HSPB6
	FBXO16	ZNF281
	FKBP1A	HOXC5
	GSTA5	RP11-165D6.1
	PALMD	CACNA1E
	MRGPRX2	AC007349.7
	TEDDM1	TSNAXIP1
	SLC25A2	RP11-630A13.4
	CLMP	CDH2
	PRKCI	CACNA1C-IT1
	CCDC115	TCTN2
	DBF4	AC112721.1
	FBLN5	BARX1
	CXCR6	PON2
	FAM45A	CNOT4
	ARL14EPL	AC004237.1
	MCAT	HIST1H4K
	TAOK1	RP5-1132H15.1
	CACNA2D1	RBM12B
	MRPS11	LGALS7
	HELLS	RP11-194N12.2
	NEDD9	EFHD1
	FAM111B	HOXD8
	ZNF654	FOLH1
	SUV420H1	TEAD1
	LYRM7	RP11-57G10.8
	WDFY1	LRRC23
	MEMO1	SEPT7-AS1
	CDC42SE1	RP11-6N17.3
	ATP8B1	AIF1L
	AGO3	DYNC1H1
	CAMSAP1	PAEP
	ZNF195	FRMD4B
	LDLRAD4	LINC01138
	RNF187	CRIP2
	PNP	GLDN
	PIBF1	GPBP1
	GSK3B	LOC100499489
	SLC25A46	OCIAD1-AS1
	GPC5	ATP2B4
	DCDC2	ST6GAL2
	C7orf41	NOTCH4
	C9orf40	USHBP1
	HSPBAP1	MTMR7
	PACRGL	MGAM
	C16orf52	GOLGA6L10
	PERP	AC003986.7
	HIST1H2BO	TMEM55A
	SPCS3	RP11-46A10.5
	FBXO9	DCTN4
	DPH3	RNU6ATAC20P
	ELP4	PLCB1
	SH3TC1	HOXD3
	CENPA	RP11-322J23.1
	GPC4	PRUNE
	CSTF2	KIFC3
	PEX7	RP11-251P6.1
	SIGLEC5	NRXN2
	SAMD15	CTB-191K22.6
	SMIM4	NRP1
	VCAM1	ONECUT2
	LSM14B	RP5-965G21.6
	ZYG11B	DLG4
	C12orf77	CRMP1
	LYZL1	IGFBP1
	LYPD6B	MARK1
	PHF11	RP11-382A20.7
	TADA1	FLG-AS1
	OGDH	LOC100507387
	CNPY3	RP11-408J6.1
	P2RY8	RP3-486I3.7
	IRG1	CBL
	RND3	AC079150.3
	FOXL1	AHCTF1
	LRIT2	RP11-274M17.3
	MLF1IP	SPDYE3
	CFHR4	LDLRAD1
	SOCS1	RP11-231G3.1
	RP2	CTB-46B19.2
	RAB33B	LINC01074
	PALLD	FLRT3
	RIC3	UCKL1-AS1
	NOMO2	RP4-550H1.4
	PMP22	PTPN12
	DNAJC24	MOCS1
	SLC19A3	BLOC1S2
	FAM196A	TRAPPC6B
	NOMO3	LRRC34
	HGD	RP11-471B22.2
	KLK12	SCHIP1
	LHX8	LARP6
	TMEM133	RNF139
	NFATC3	FAM155A
	BICC1	PDE1B
	DEPDC4	KIDINS220
	CRY1	ARSI
	BOD1L2	RP11-665C16.5
	IGBP1	RDH10
	PIP5K1A	LOC653513
	SAMD12	TAS2R3
	HLA-E	TOR1AIP2
	ATXN3L	KLHL30
	RP11-1220K2.2	SRGAP1
	MAT2B	DAD1
	GADD45A	AP000892.6
	GIMAP1	MCAM
	KLRG1	ENPP7P13
	OCIAD1	TSC22D1
	C1orf229	C11orf70
	SNRNP48	CAV2
	LDOC1L	LEPR
	SLC1A6	RNU11-4P
	DNAAF2	FLT1
	DBNDD2	RP11-402P6.9
	KCNE1	PATZ1
	SF3B4	AL590431.1
	TM4SF1	PSMC1
	C18orf25	RP11-862L9.2
	NDRG1	LOC100996634
	HNRNPA1	UBAP2L
	CNOT6	EPAS1
	SOX9	C16orf52
	FAM174A	PTCHD2
	ZMAT3	WFIKKN2
	TEF	RP11-756H6.1
	SRSF10	LAMA5
	HAVCR1	RAD51B
	HARS	ADAM20
	TK2	RP11-843B15.4
	MCC	SPEF1
	PLEKHA7	ATG12
	SMIM19	ZC3H11A
	PCCB	S100A13
	GNG4	TMEM55B
	TCEB1	CCNH
	STOM	LOC101927257
	GLUD2	C1orf74
	RNF141	TAGLN
	ZNF772	STX2
	ENTPD4	RP11-52J3.3
	TNRC6B	RP11-266E6.3
	SLCO3A1	COL13A1
	LZIC	GRM2
	KIF27	COMT
	CNR1	GSTM3
	PCGF3	HIST1H4J
	UBN2	INPP4A
	PRKRA	RP11-312J18.6
	GNL3L	RNASE2
	RABGEF1	KCTD3
	SEPHS1	DAAM1
	KCTD10	RP11-1086F11.1
	RNF14	LINC01219
	MB21D2	COPS7B
	BOD1	ARHGEF15
	FBXO21	FAM127C
	FBXO32	RP11-135D11.2
	GCLC	NPR1
	CPSF2	TGFB3
	C11orf54	CCDC153
	BEND6	CD109
	AGPAT4	PPAPDC1A
	SLC35G1	PABPC1L2B-AS1
	BRCC3	LOC100130673
	MESDC1	BEX1
	PURB	AQP1
	CCDC171	MAB21L2
	SFRP2	WSB1
	HIST1H2AH	CILP2
	GXYLT2	RP11-367H1.1
	ZNF730	ZNF280C
	RAB14	C11orf63
	NCAM1	ZNF14
	TMEM255B	KDM3A
	B3GALT1	HOTAIRM1_2
	GUCY1A2	EGFL7
	AGT	DPY19L2P4
	CEBPD	PLA2G5
	APLF	GPIHBP1
	TTLL3	OTUD7B
	HEBP2	RP11-307O13.1
	PEX26	VTRNA1-3
	SRPK1	VKORC1
	RBM17	SLC26A10
	METTL12	USP47
	MRAS	GPC3
	COMMD9	LINC01075
	UQCRC2	C14orf1
	MRPS5	MIR4271
	CUL4B	MUC15
	SULF2	RP11-166B2.7
	HIAT1	PELO
	PLGLB1	APMAP
	PLGLB2	SLC35B2
	DICER1	GUSBP1
	TDRD6	RP11-543C4.1
	WDR53	LOC101927282
	FAM105A	ARL13B
	NME6	CDKN1C
	DIRC1	HSPB2
	GHSR	PDIA2
	APOBEC3F	MPPED2
	MRPL22	PPP1R12A
	NCAPH	TENM3
	CENPK	MAST4-IT1
	RBMY1D	PMCH
	RP11-322L20.1	ACMSD
	RBMY1F	TBXA2R
	KRTAP9-7	FER1L5
	ZBBX	SNORD112
	RBMY1A1	UBR3
	RBMY1J	NLRP12
	FAM9C	RNF41
	MC2R	KCNMA1
	RBMY1B	MEIS2
	RBMY1E	MORC2-AS1
	ZNF80	PON1
	CWC27	ACTA2
	CCDC109B	GPR173
	CFHR3	FAM74A1
	RNF38	AC011891.5
	CHMP2B	PCDH9-AS3
	ZNF736	NEK7
	ENO2	RGS19
	LL22NC03-63E9.3	AP001505.9
	ESAM	EGFLAM
	TNFSF13B	LILRA6
	VAMP1	ASF1A
	RSPH10B	OSGIN2
	PFKFB3	CYP11B2
	MARS2	NXPH1
	OPN1SW	ARHGAP5
	CCDC68	JMJD1C-AS1
	ZNF598	SLC7A9
	CSH2	EPHX3
	RND1	AC009120.5
	IL10RB	HIF1A-AS1
	DAOA	DZIP1
	C1orf174	WNK1
	LAS1L	ARHGEF40
	CCDC152	RP13-650J16.1
	SLC1A7	PTH1R
	SERPINI1	RP11-661D19.3
	WNT3	C8orf88
	PDCD6	PGF
	NR3C2	NFATC4
	CCNC	CSPG4P1Y
	NEUROD6	TAS2R45
	SPOP	CTB-54I1.1
	SOX2	STON1
	GPR12	PIK3CA
	EIF5A2	MXRA7
	CHMP4B	P2RX6
	SRC	SCRN3
	PPP1R3C	RP11-290F24.3
	SNX5	MAFA-AS1
	NUP85	ID4
	RAB1A	CCDC180
	PHF17	RP11-664I21.5
	H3F3B	ITIH3
	APBB2	LINC01296
	SNAP29	ZBED6
	CDYL2	LOC100288162
	FAM175A	PARP2
	ENOX2	DBIL5P2
	VMP1	KLHL5
	SMAD5	KERA
	SENP2	GS1-166A23.2
	FGFR2	USP34
	ZNF292	ZNF362
	SPOPL	DCBLD1
	MAPK6	CST6
	PIAS1	SRRM3
	CLDN6	RP11-1217F2.15
	ULBP3	TRIM39
	LAX1	TNS1
	KDM5A	LRRC4
	NPHP1	MIR3180-2
	RP1-170O19.20	RP11-665I14.1
	M6PR	DYNC2H1
	EXD2	MIR6835
	RBM33	RP11-659P15.1
	FAM214A	SLC22A17
	ZNF135	RP11-381K20.4
	GID8	PCDH12
	ARHGAP31	RP11-475B2.1
	ACSM3	RP11-1334A24.5
	C11orf74	CHD5
	UBE2V2	NOVA1
	ASUN	LOC100288570
	EXT2	LOC442028
	KDSR	MIR4525
	EEPD1	FAM171A2
	CFL2	FBXO36
	SMARCE1	ZNF404
	MBD5	LINC00272
	OTUD7A	DSEL
	WDR41	LINC01558
	RP11-195F19.5	AC006126.3
	ZNF138	NBEA
	LIPG	CTD-2135D7.3
	SOX18	NME7
	CDH11	RP11-132F7.2
	ECI1	CYP2C19
	ZWINT	RP11-177G23.2
	RNF24	KCNH6
	ZFAND5	RP11-1136G4.1
	C9orf156	MIR590
	UBE2D2	CTD-2544H17.2
	RPP30	RNF146
	STK16	MIR4759
	MORF4L1	S100A3
	LILRA2	RP11-85I17.2
	TOP1	ATF7IP
	BBOX1	MIR103A1
	KCTD11	AP3B2
	PHF12	HP
	FRZB	RP11-834C11.8
	KCNMB1	STXBP4
	OMD	COX19
	ZFAND6	LL22NC03-2H8.5
	LRRC19	S100A9
	CNRIP1	KCNAB1-AS1
	U82695.9	A2MP1
	NDUFB4	RP11-467I17.1
	RPE65	MYOM1
	MAGEE2	Z69720.2
	SYT11	CTD-2263F21.1
	RNASE11	RP11-192H23.5
	CIDEC	SLC2A4
	ANKRD10	SIX4
	MYCN	HAS1
	ADM	RP11-391L3.3
	LGI1	VEPH1
	FZD10	RP11-274J7.2
	SLC1A2	EPM2A
	ACADL	HOMER3
	SLC12A1	SNORA14B
	L3HYPDH	TRAM1L1
	NOMO1	CAPS2
	TTC6	TRPS1
	PIP5K1B	TMEM132E
	CST9	RP3-331H24.7
	MSRA	NIT1
	CST3	RASIP1
	CABLES1	SLIT2
	SOWAHA	RP11-803P9.1
	RP11-122A3.2	RP11-142A5.1
	BATF2	RP5-940F7.2
	LIPH	MGAT2
	SIX6	C2orf42
	BTNL9	PRKCDBP
	HRH1	SOX13
	EIF1AX	FXYD6-FXYD2
	MFAP5	LIPC
	PSG1	MEIS3
	STK32B	ULK1
	CMKLR1	TTC7B
	CDC42EP2	LOC145474
	PPP2R5E	AC012442.6
	SEPT6	RP11-108M9.2
	TMEM128	PJA1
	HMGN2	LOC101926942
	SYNPO2	LOC101928205
	METAP1D	ZDHHC17
	NDUFAF5	MRAS
	SPICE1	SLITRK1
	CARHSP1	DZIP3
	RHOQ	ADGRG2
	CDKL1	CYB5R1
	AP005482.1	PLA2G16
	NEK7	WI2-89031B12.1
	TOR1AIP1	RP1-102K2.6
	LEPROT	TCF24
	RIF1	DZANK1
	AMER2	KIF3C
	KIAA1217	AC005785.5
	WDR70	RP6-65G23.5
	EFCAB6	RP11-671P2.1
	PFDN6	IGFN1
	FAM57A	MEAF6
	ARHGAP28	AL157871.2
	HADHB	TIMP1
	KCTD4	SORBS1
	PPM1A	SOX11
	ELMO1	MIR2467
	FAM89A	ARHGEF9
	EGF	UXS1
	SOCS2	COMP
	ZFP36L2	CLEC4GP1
	C8orf47	TMEM18
	ADD2	GAPLINC
	FAM84A	CTC-277H1.6
	OLFM3	RP11-42O4.2
	NDUFA5	PRRT4
	CXorf56	RP11-446F17.3
	ARPP19	ZBTB20-AS2
	ANKRD32	STK3
	PRSS12	LOC100507334
	GSTK1	AP002954.3
	CLVS2	DPP10-AS3
	PTBP3	LY6E
	LNPEP	RP11-248J18.2
	NPFFR2	SFRP1
	RNASEH2C	IKBIP
	ZNF747	SCGN
	NOL10	CLU
	GRPEL1	RP11-62I21.1
	SH2D4A	RP11-251M1.1
	METTL2B	INO80D
	RAB40A	OXR1
	SUB1	BEST4
	TRAPPC2L	FMO4
	MAPK1IP1L	RAB6B
	AMD1	THRSP
	RLN2	BCAM
	APEX2	MNAT1
	CISD3	TMEM86A
	ABHD6	PISRT1
	WDR3	SHC1
	FGL2	KIAA1919
	THUMPD2	NCK1
	MINPP1	RP11-881L2.1
	WDR77	PDHA2
	TMEM135	SLC39A4
	OBFC1	RP4-545C24.1
	WBP4	CDR1
	PPIC	FLVCR1
	CSTF2T	HIST1H2BD
	TUBD1	LOC100129520
	MRPL52	AC073928.2
	PPIL4	RP13-516M14.10
	SFPQ	AC064853.2
	PCDHB3	CCL2
	NYAP2	KCND1
	IL1F10	NCKAP1
	FCGR2B	RP11-729I10.3
	ARHGEF38	TMEM133
	FAM167A	RN7SL752P
	ANKRD46	CGNL1
	DTX2	WDR20
	FOXN2	SNTB1
	RAB38	RP11-316M1.12
	TMEM131	NXPH3
	PPP1R2	BTBD7
	SPATA5L1	NWD2
	RNF145	JKAMP
	ANO10	NOXRED1
	MMD	RP11-575F12.1
	NKX3-1	ETV3
	SALL4	ZNF592
	KLKB1	MORC2
	ZNF717	GIPC3
	POLR3E	PRKACA
	ZNF493	RP11-501E14.1
	PTMA	EEF1A2
	COL1A1	MAP2
	HLA-DRB5	SNAI1
	NFKB1	ITGB1
	KCNIP2	CTD-2176I21.2
	SASS6	MGC16025
	CASC4	CTC-458I2.2
	TRMT12	TAF7
	QRICH1	ZNF425
	CBX3	RP4-630C24.3
	ARID4A	PCAT1
	TLR3	VEZT
	IBTK	RP11-326G21.1
	AL645730.2	ZFP37
	PYGB	C5AR1
	PLXNC1	CTD-2283N19.1
	IDO2	MAP3K7CL
	AC117834.1	TCL1B
	TFAM	SNHG24
	BRK1	XXyac-YX155B6.7
	TFEC	TMEM150C
	CD207	AC012370.2
	LYZL2	MORN3
	KY	RP11-861L17.4
	EIF2S2	Z98750.1
	DDX60L	DPY19L2P2
	ZNF561	CHST1
	RASEF	DDX46
	MAGEA11	RP11-164N3.2
	CD69	RP4-551N11.1
	DMP1	IL31RA
	EID2B	FLNA
	TEX9	ERH
	TXLNA	RP11-295P9.8
	MRFAP1L1	NBPF15
	NDRG3	RP11-709A23.1
	LIN54	RP11-770J1.3
	EGR4	OSR1
	TVP23B	SP3
	PRNP	CTD-2532K18.2
	DSG4	AC006547.8
	AC008132.1	CTD-2095E4.4
	CORO1C	AC073987.1
	PAN3	DICER1
	KLF6	AP000695.6
	FAM19A4	SLC22A4
	ZNF131	IRAK4
	CTSS	LOC101593348
	CPLX4	RP11-69C13.1
	WDR47	SOX18
	BLOC1S6	RP11-190D6.1
	FAM20C	5-??
	NINL	KCNG1
	MDM4	CHD6
	UQCRFS1	MAGEA12
	TEAD1	SGCE
	PDS5A	KB-1572G7.2
	HOOK1	RP11-686G8.5
	RSF1	RP11-2I17.4
	CARM1	CTD-2024I7.18
	UBE2I	RP11-406D1.2
	TNFRSF21	CTD-2555O16.4
	TM6SF1	MSANTD4
	ANK3	SV2B
	MSX2	MIR320B2
	RBBP7	FAM110D
	MAOB	VGLL1
	ATOX1	MIR648
	MBP	RP11-173M1.8
	SRPK2	OR5D18
	ZNF581	RP1-193H18.3
	ZNF555	VCAN
	PEPD	TMEM91
	RGMB	RP1-137D17.2
	CTNND1	CNTNAP3P2
	TAL2	snoU109
	ZNF224	ACTR3
	FOXE1	AL136419.6
	PANX1	CD99
	KDM2B	DDX24
	CIR1	RNF139-AS1
	PDE10A	GRB10
	ARMC10	RCOR3
	SPATA6	ETNK2
	ONECUT2	RP6-65G23.3
	C5orf28	SMA4
	EID1	SFRP2
	PTPN2	ANO6
	PPP4R1L	FJX1
	PHF20L1	RASSF8-AS1
	EHF	RP11-17A4.3
	RAB3D	CTC-205M6.5
	RABIF	EBAG9
	HOXA9	EGLN1
	RPL18A	MIR630
	ZNF217	RN7SKP123
	N6AMT1	SERINC5
	AC007040.11	LOC100506639
	UBQLN2	RP11-430B1.1
	PLSCR1	LOC101927189
	TXNRD1	SPOCK1
	SLC25A53	F8
	GATA6	METTL18
	A1CF	FTX_2
	ARPC4-TTLL3	TTLL7
	ESRRB	WDFY3-AS1
	KLF7	TRIM61
	EVX1	C6orf165
	GNL1	MIR3914-2
	RGS9BP	AC092620.2
	BCDIN3D	SLITRK4
	TIRAP	TMEM81
	FMNL1	TRPC1
	LPAR3	WSCD1
	NPM1	HIST2H3D
	MOCS2	PCDHB5
	PAQR3	RUNDC3A
	ABI2	ARHGEF17
	MAD2L1	CLIP1
	BTG1	RP11-79N23.1
	MPZL1	OR5H15
	COA1	NBPF14
	TM2D2	CTD-3023L14.3
	CABLES2	FAM161A
	RAB2A	GJC1
	EI24	MIR5188
	STMN1	FOLR1
	PRPF4	CABP1
	CDCA3	GZF1
	CDKN2C	ZNF676
	GBX2	IL4
	SLC2A4RG	STATH
	CRK	ZNF680
	GABRB1	SH3PXD2A
	SF3B5	NAALADL1
	COX16	C11orf95
	LRRC39	MAST4
	AC093677.1	CTSLP2
	CDC42	KLHDC8B
	PPIF	TFCP2
	TNFSF18	HNRNPH2
	NPFFR1	DNAH10
	CCL16	BICD2
	SLC5A8	MCF2L
	ARHGEF3	AQP7
	RNF113B	STX1A
	ZNF534	CD276
	EPSTI1	C7orf33
	KLLN	WDFY3
	FPR2	ANKS3
	OR9Q1	BMP7
	CD4	AC005150.1
	ZNF521	GLI2
	C13orf35	LZTS3
	AS3MT	SCEL
	PTBP1	RP11-1149M10.1
	ATP11C	WASF1
	C8orf49	TLK2
	PCSK4	XXcos-LUCA16.1
	ENPP3	TAF9B
	NFASC	SNORD20
	KCNA1	ZNF611
	GSPT2	DNAH12
	PTPRM	RP11-22H5.1
	SLC16A12	CTSF
	CLDN16	SULT1E1
	RFXAP	RP11-841O20.2
	TYR	ECRP
	ZC3HAV1	LYPD3
	MIB1	RP11-797D24.3
	PARD6B	MRPL45P2
	HRH4	AC017028.2
	DTD2	HIST2H2BE
	GRM7	FERMT2
	PPP1CC	TBC1D8
	MCM3	KDR
	CCDC39	CTC-281M20.4
	RFX5	LINC00391
	ITCH	BOC
	UGT2B17	UPK1A
	SHB	RP11-930P14.2
	B3GNT2	RP11-735B13.2
	TMEM257	RP11-3B7.1
	GEM	CNOT6
	CCDC36	COL4A1
	WNT2	CECR6
	KCNE3	KANK4
	MYLIP	RP11-406O23.2
	PROX1	CYP20A1
	HNRNPL	PKD1
	ANKRD27	RP11-191L9.4
	GALNTL6	KIAA0408
	BIN2	RP11-302I18.3
	DTD1	ZNF34
	MAPRE2	WIF1
	MUC5B	GTSCR1
	SOX3	MIR5194
	ANKRD13A	SRA1
	DPAGT1	GPRASP1
	SMARCA2	AMIGO2
	KCNA4	RAET1L
	GSTM2	C3orf80
	SLC26A7	TMEM74B
	KIAA1257	PABPC4L
	KRT6A	RP11-93B14.4
	C17orf67	ZNF114
	CD80	DPYSL3
	SH3YL1	POLR3B
	CDK14	TP53TG3
	SLC25A38	KCNMB3
	RAP2C	RP11-338K17.8
	ATP9A	AC017028.6
	SYBU	FHOD3
	TMEM68	AC007952.4
	HSD11B1	RP11-33B1.4
	ACLY	RP11-649E7.5
	FERMT2	PIAS3
	ZNF200	DKK4
	FANCI	DFNA5
	GNAQ	CLK2
	SETD7	RP11-968A15.8
	MBD4	SCNM1
	SYS1	KCNMB1
	RFFL	C16orf87
	PUS7	PRSS53
	CDC42EP3	RP11-13J12.2
	KPNA6	RP11-236P24.3
	DLC1	LGI4
	C11orf30	TERF1
	SPIN1	RP11-373D23.3
	EGR3	STXBP5L
	ZNF487	NDP
	TMEM215	SLC46A2
	NIPAL1	HCN3
	PARM1	AC141928.1
	XIAP	AC012414.1
	GLCE	SLN
	AMOTL2	FRMD5
	RNF138	RP11-108K14.12
	MLLT11	C9orf84
	BAMBI	RP11-63A2.2
	WNT8B	ACVR2A
	TC2N	PSMD4
	LRRD1	ENAH
	SLC30A5	PRR36
	FAM81A	LILRA5
	AL645728.1	CIDECP
	SH3BGRL2	XAGE3
	AMOT	MAGEA3
	GABRQ	PKP1
	ELFN2	VIPAS39
	ZNF597	ARID4A
	PRICKLE1	RP11-297L17.2
	CCAR1	GNG4
	RNF186	RP11-421P23.2
	STARD5	KRT34
	GLP2R	SNX21
	PANK2	CMA1
	DDHD1	TMX1
	MIPOL1	RP11-865I6.2
	SYT7	RP4-633I8.4
	KLHL7	RP11-848D3.5
	TTL	RAB3GAP2
	TXNL4A	NEDD8-MDP1
	ALX1	RP11-1437A8.5
	ITPA	RP3-438O4.4
	MED6	RP11-319G9.5
	ARL1	CDR2L
	TRAPPC4	NAPB
	HSPA9	FBXO36-IT1
	PDK1	PROX1
	BCL10	YIPF5
	RNF115	TRIML1
	C4orf40	PRICKLE1
	TTR	RP11-101E13.5
	CCR7	SMARCA1
	DLD	ARHGAP6
	AP5Z1	NDRG1
	MRPL19	LOC102724957
	AKAP11	LL22NC03-86G7.1
	GTF2H2	RBMS1
	NLN	NGRN
	NDP	AC068137.1
	AARD	ARAP3
	FAM179B	RP11-349F21.5
	MALL	LOC101929532
	ETAA1	GLTPD2
	MBNL1	RP1-45I4.3
	PHACTR1	DEFB133
	NLK	RP11-445P19.3
	BARHL2	SLC30A3
	LPIN2	ZNF750
	EOGT	RP11-137H15.3
	LYVE1	KRTAP27-1
	DDX50	ADAM17
	PGRMC1	PRRX1
	RP11-382J12.1	PCGF2
	SPP2	SAMD14
	CPEB1	FAM183A
	PIANP	RP11-158I9.8
	HTR7	AC004878.2
	RNF222	RP11-187O7.3
	TP53TG3	MOK
	C8orf22	DTNA
	RARG	PPP2R2B
	CHST9	CTB-152G17.6
	RGR	SNORD113
	TP53TG3B	CTD-2562J15.4
	FUBP3	LOC100505716
	ABHD17C	GAS2
	IRF8	PRB3
	ZSCAN23	LZTS1
	AGK	RP11-423E7.2
	SLC29A3	AC104946.1
	FOXO3	LOC100506700
	DARS	ZNF431
	CNKSR2	ARL8A
	ZNF497	NKPD1
	IGSF1	CEP170P1
	SLC25A43	VTI1B
	TP53TG3C	RP11-264B14.1
	RSPO2	RP11-164C12.2
	DPYSL2	MAGI2-AS3
	TMTC2	SEL1L
	NRBF2	AC002076.10
	PRR16	CDC42BPB
	BANP	RP11-138H8.8
	NPTX1	RP11-250B2.3
	HTR3D	PALMD
	RHAG	DOCK6
	C15orf53	AC012627.1
	TDRD10	XGY2
	AGTR1	DDIT3
	ERCC6L2	HOMER2
	CASP14	AC005740.6
	SLC4A5	XRCC4
	CILP	LMAN2L
	CBY3	FICD
	TTPA	RP11-787I22.3
	C9orf84	ST6GALNAC3
	TMEM255A	RP11-15A1.9
	NAP1L2	VGF
	GCNT2	ANXA6
	GPR183	CDR1 AS
	CFTR	RP1-79C4.4
	LBH	ADAM8
	SMIM14	ZNF442
	TRIM21	S100A1
	TNFRSF10D	CTC-498J12.1
	PRKAB2	LRRTM1
	HOXA3	RP11-100E13.1
	ZDHHC20	CANX
	C10orf12	RDX
	IRAK4	CTD-3032H12.2
	SORT1	SYNJ2BP
	PLSCR4	TCEB1
	LBR	SUN2
	NECAB1	HIC2
	MED18	RP11-235G24.1
	SMIM21	NEFM
	SCN3B	RN7SKP124
	KCNK17	PCDH9
	MICU1	LINC01492
	AGFG1	RP11-110L15.2
	DCAF13	CTC-343N3.1
	RAB3IP	RP11-400N13.3
	MRPL30	RP11-327J17.2
	C2orf15	FLOT1
	SLC46A1	CLN5
	MAFB	CTD-3214H19.6
	STT3A	RP11-748C4.1
	MOB4	AC107871.1
	OXNAD1	GABRG2
	RORA	RP11-401P9.4
	ZNF460	SIRT4
	ZNF665	TRIM43
	RBM47	CALCRL
	GINS1	COMMD10
	AGPAT5	NDFIP1
	SEMA6D	NPNT
	ZNF302	ZNF221
	TTF2	KGFLP2
	TMEM183A	AC004257.1
	VGLL3	RP11-62F24.2
	FGFR1OP2	MIR4799
	BDH2	LRCH1
	HSPA6	RASAL2
	FILIP1	UBN1
	RAD54B	AC009262.2
	TOB2	SAMD8
	HIST1H2AK	AC013463.2
	SERBP1	CTD-3096M3.2
	RAD51B	TMPRSS11E
	QKI	IQCD
	THRB	CPD
	LIFR	RP11-284F21.8
	EGLN3	AC073130.3
	C3orf38	RP11-91P24.7
	FRS2	AC010127.3
	EIF2S3	CERS5
	APOA5	THSD7A
	TCF24	BICD1
	UBE2K	RP11-659E9.4
	DCUN1D3	MARCKS
	ATF2	OSM
	CGGBP1	PEX2
	EBF2	CTA-390C10.10
	ZFPM1	CHRNB1
	CREBL2	CRELD1
	CLCN3	FAM43A
	ANKRD44	POGZ
	TGFB2	C3orf56
	RFC1	USP32
	TXNRD3NB	SPARCL1
	SLC33A1	RP1-97G4.1
	CITED2	HIF1A-AS2
	ADAT2	CTHRC1
	ZNF347	MIR1248
	KIAA1324L	OR7E2P
	SLC35F5	FCRLB
	GOSR2	LOC441155
	TTC30B	GDAP1L1
	SETD6	HOXD9
	SBNO1	RP11-872J21.5
	ZNF57	GS1-39E22.2
	PRKD1	SNAPIN
	ZNF620	TCTEX1D1
	C2orf68	AC092168.2
	BRD9	RP11-252I13.2
	C5orf63	PTBP2
	PNPLA8	CTD-2526M8.2
	BACE2	TMEM79
	DTWD2	CBLN4
	GAS7	CUL4B
	ZNF431	RP11-13K12.6
	UCK2	RP11-543H23.1
	C1orf95	APOA4
	WDR91	COL21A1
	AP5M1	RP11-894P9.1
	MED7	AC019186.1
	GPRC5B	RP11-797D24.4
	CEP164	ZNF847P
	MAP2K6	RP11-771K4.3
	SLC6A4	NEB
	GRM8	LOC100506688
	EIF2S1	RP11-968A15.2
	USP25	ZNF10
	TMPRSS6	ELK3
	TTC39A	PTPRU
	LOX	FAM84B
	PPIL6	ZNF430
	PICALM	MIR103A2
	EEFSEC	CTNNA2
	RSRC2	FLVCR1-AS1
	SLC25A11	CCDC8
	KRR1	CCNYL1
	SSBP2	PKD2
	ANP32B	BPTF
	OCIAD2	RP1-34H18.1
	OAZ2	LOC102659288
	NCKAP1	MAML1
	FECH	GON4L
	DEFB107B	CERS1
	IBSP	VLDLR
	CRIPT	RP11-958J22.3
	DEFB107A	MAGI1-IT1
	RNLS	CNDP1
	KCNAB1	CTD-2254N19.1
	MSRB3	RP5-890E16.5
	MAPRE1	APBB1
	ZNF697	RP11-319G6.1
	ZNF140	GPAM
	RABGAP1L	DUSP12
	OTUD1	POMT2
	LINC00923	GSTT2B
	SLCO1C1	MARVELD2
	GRIA4	RP11-196G18.3
	AL583828.1	RP11-15A1.8
	PTPRN2	PTPRZ1
	MAGEC2	TREM1
	FOXH1	ROS1
	TRPC3	MAP1A
	LIN52	QKI
	PRKX	SLC10A6
	MSH2	ZNF623
	IL7	SNORA38
	HSDL1	ZNF474
	RRM2B	UNC5B
	DCTN3	CTNNAL1
	CEP128	RP11-464D20.6
	IL17A	EHMT2
	DHX40	ADH4
	ACO1	RP11-73M11.3
	COPS2	SNX16
	OTX2	SOX7
	FZD4	GPC5
	ITGB2	NR2F2
	CLCN2	RP11-234G16.4
	ADIPOQ	HSDL1
	ROBO1	FAM213A
	SLC22A9	RP11-212E4.1
	NET1	TRAPPC2B
	C2orf43	RP11-123B3.2
	CEP120	HIST1H2AD
	CCDC82	GRIA3
	CCND1	AC018890.4
	SHISA2	NRK
	BNIPL	CTC-436P18.1
	ZNF423	DIP2C
	CTD-3193O13.9	VEGFB
	ABHD17B	RP11-44F14.7
	FSTL5	CERCAM
	KRTAP5-4	PPIL2
	RGPD1	FAM225B
	CMIP	ZNF516
	NDNL2	RP11-762H8.5
	FAM19A5	RIMKLB
	PDZRN3	RP11-173D3.1
	RPRD1B	PTPRN2
	SLC17A6	ARHGDIG
	C2CD5	CFAP53
	EPAS1	ZNF185
	TMEM199	NBPF3
	RGPD2	GINM1
	ASB13	SMYD4
	UNC45B	TMEM100
	USP18	STAU2
	CD96	RP11-106D4.2
	CCDC117	CREB1
	UBFD1	CTB-31N19.3
	WDHD1	PPP1R3C
	SPRY2	MROH2B
	PRRG2	RP11-358B23.7
	C14orf105	PHACTR2
	TMIE	ZNF467
	CLEC4D	POSTN
	PLEK	RP11-1109F11.3
	AC104472.1	HIGD1B
	GAS1	TTC31
	TMEM163	EXOC5
	GPR45	RP11-14I17.2
	FAM8A1	TBC1D3F
	BTG2	RP11-1109F11.5
	N4BP2	AC025627.1
	FARSA	OGDHL
	MAP3K7	RP11-456O19.2
	MED8	C6orf48
	CCBL2	XKR7
	AGBL4	FAM219A
	PRDM12	RP11-507K2.6
	TRPA1	RP11-118M9.3
	GTPBP3	DCBLD2
	UBXN4	CFAP36
	STK4	CTC-340D7.1
	MMP19	JAM2
	PLCL2	CLSTN2
	ALAD	NKD2
	ST6GALNAC3	TMEM154
	SLC16A10	TYRO3P
	PACSIN2	SGTB
	ZNF616	RP11-3D4.4
	VPS36	RP11-328C8.5
	C3orf70	SRSF12
	ARSD	RP4-541C22.5
	PIGX	CTC-505O3.3
	NTS	LRRN4
	ARL5A	EPB41L5
	ZNF583	RP11-383J24.6
	AGXT2	MSRB3
	ORC2	PPAP2B
	LAD1	CTD-2349P21.3
	OXCT1	NBPF9
	C6orf211	AMDHD1
	SERP1	ZNF808
	PDE4D	TINF2
	MOCS3	SEMA3C
	GALNT12	RXFP1
	DDTL	THOC5
	TNPO1	KRT80
	LMBRD2	ROBO4
	NCKAP5	PCBP2-OT1
	FBXL4	LINC00641
	TGFBR2	RP11-230F18.5
	EXOC7	CLEC4G
	BZW1	CREBBP
	VANGL1	SOGA1
	AK3	FAM26D
	ENPP5	PLGLB2
	RSPO3	AC015849.19
	CD44	DEDD
	SPIB	PTGIS
	AC021218.2	C1orf43
	RABL3	BAGE2
	FBXO48	AMOTL2
	ONECUT1	RP4-620E11.8
	FAM184B	TFPT
	UBLCP1	CDIP1
	MARCH5	RP11-618K13.2
	MED12L	RP11-351I21.11
	GBP1	AOC4P
	TTC28	PREX2
	CSE1L	C16orf89
	ZNF230	RP11-158K1.3
	UBA2	SHE
	ALKBH1	CNPY4
	FAXC	RP11-343L5.2
	YWHAB	AL158069.1
	TMEM41A	SLC26A9
	CNNM2	HDAC5
	ALG2	RP4-594A5.1
	TFAP2B	HMCN1
	SLC7A11	CTD-2162K18.3
	PAIP2B	ANXA8
	RPGR	EPHB6
	KLHL18	RP11-240G22.4
	GOSR1	MIR4441
	NHLRC1	LRRTM2
	FAM114A2	DDX43
	SDPR	AF001548.4
	TIMM8B	SEC63
	RHOF	PGBD1
[truncated: 3,411 more rows]
